# Supplementary material for: A conceptual framework for quality assessment and management of biodiversity data
Source: PubMed Central journal article supplement (PMC5489162; doi:10.1371/journal.pone.0178731), 2017-06-28
Supplement: pone.0178731.s001.pdf [file pone.0178731.s001.pdf]

**Conceptual Framework on Biodiversity Data Quality**

S1 Supporting Information: Framework Validation  
- Proof of Concept -

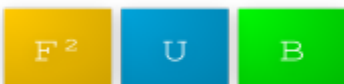

Authors: Allan Koch Veiga, Arthur David Chapman, Paul John Morris, Christian Gendreau, Dmitry Schigel,  
Tim James Robertson, Antonio Mauro Saraiva



The purpose of this document is to present a proof of concept that allow to stress all the concepts of the framework, and show how it can be used to assess the fitness for use of biodiversity data. This document does not intend to present a complete reference for dealing with DQ, but illustrate with simple examples how to proceed to instantiate all the concepts of the framework. This proof of concept was conceived based on a case study conducted in the Museum of Comparative Zoology of Harvard University using a Dataset from Arizona State University Hasbrouck Insect Collection (<http://symbiota4.acis.ufl.edu/scan/portal/collections>). All data used and generated in the study case are available at: <http://case.bdq.biocomp.org.br:3010/explorer>.

This document is organized into three sections: DQ profile, DQ solutions and DQ status. The DQ profile section define the DQ needs for a specific Use Case; the DQ solutions defines the solutions used to meet the DQ needs described in the DQ profile; and the DQ status reports the status of quality of two different Data Resources based on the DQ profile.

# 1. DQ PROFILE

## 1.1. Use Case

**Curation of Biological Collections:** This Use Case is related to the curation tasks required to keep biological collections data fit for general uses, such as basic geospatial visualization and analysis where data of location, date and taxon of species occurrences are required.

## 1.2. Valuable Information Elements

List of Information Elements that are particularly important for being used in the Use Case. Those Information Elements must have suitable level of quality for being considered fit for use in the Use Case context.

### COORDINATES

| Information Element description                                                                                                                              | DwC Elements                                                       |
|--------------------------------------------------------------------------------------------------------------------------------------------------------------|--------------------------------------------------------------------|
| The geographic coordinates (in decimal degrees, using the spatial reference system given in geodeticDatum) of the geographic center of a species occurrence. | dwc:decimalLatitude,<br>dwc:decimalLongitude,<br>dwc:geodeticDatum |

### SCIENTIFIC NAME

| Information Element description                                                         | DwC Elements                                        |
|-----------------------------------------------------------------------------------------|-----------------------------------------------------|
| The scientific name of the species (typically genus + specific epithet) and authorship. | dwc:scientificName,<br>dwc:scientificNameAuthorship |

### COLLECTED DATE

| Information Element description                   | DwC Elements  |
|---------------------------------------------------|---------------|
| The date when the collection event was performed. | dwc:eventDate |

## OCCURRENCE

| Information Element description                                                                                                                 | DwC Elements                                                                                                                                 |
|-------------------------------------------------------------------------------------------------------------------------------------------------|----------------------------------------------------------------------------------------------------------------------------------------------|
| An occurrence comprises the location and date where a species sample was collected or observed and its identification with its scientific name. | dwc:decimalLatitude,<br>dwc:decimalLongitude,<br>dwc:geodeticDatum,<br>dwc:scientificName,<br>dwc:scientificNameAuthorship,<br>dwc:eventDate |

## 1.3. DQ Measurement Policy

List of Dimensions in context that are particularly important for supporting the assessment of the fitness for use in the Use Case context. High quality of those Dimensions in context denote that data are pretty fit for use in the defined Use Case. Those Dimensions in context will be the target of the DQ Amendment.

### COORDINATES COMPLETENESS OF SINGLE RECORDS

Measure the presence of value for all elements of the Coordinates. The measure will be "COMPLETE" when latitude, longitude and *geodetic datum* values was supplied, else the measure will be "NOT COMPLETE".

| DQ Dimension | Information Element | Resource Type |
|--------------|---------------------|---------------|
| Completeness | Coordinates         | Single Record |

### COORDINATES CONSISTENCY OF SINGLE RECORDS

Measure the consistency of the Coordinates with the associated country, state/province, county and locality of the record.

| DQ Dimension | Information Element | Resource Type |
|--------------|---------------------|---------------|
| Consistency  | Coordinates         | Single Record |

### SCIENTIFIC NAME COMPLETENESS OF SINGLE RECORDS

Measure the presence of value for all elements of the Scientific Name. The measure will be "COMPLETE" when scientific name and scientific name authorship values was supplied, else the measure will be "NOT COMPLETE".

| DQ Dimension | Information Element | Resource Type |
|--------------|---------------------|---------------|
| Completeness | Scientific Name     | Single Record |

### SCIENTIFIC NAME CONFORMITY OF SINGLE RECORDS

Measure the conformity of the Scientific Name values with nomenclature authorities.

| DQ Dimension | Information Element | Resource Type |
|--------------|---------------------|---------------|
|--------------|---------------------|---------------|

# Framework Validation - Proof of Concept

---

Conformity

Scientific Name

Single Record

## Framework Validation - Proof of Concept

### COLLECTED DATE COMPLETENESS OF SINGLE RECORDS

Measure the presence of value for the Collected Date. The measure will be "COMPLETE" when event date value was supplied, else the measure will be "NOT COMPLETE".

| DQ Dimension | Information Element | Resource Type |
|--------------|---------------------|---------------|
| Completeness | Collected Date      | Single Record |

### COLLECTED DATE CONSISTENCY OF SINGLE RECORDS

Measure the consistency between the Collected Date and the modified date and the life span of the collector.

| DQ Dimension | Information Element | Resource Type |
|--------------|---------------------|---------------|
| Completeness | Collected Date      | Single Record |

### OCCURRENCE COMPLETENESS OF SINGLE RECORDS

Measure the presence of value for all elements of the Scientific Name. The measure will be "COMPLETE" when latitude, longitude, *datum*, scientific name, scientific name authorship and event date values was supplied, else the measure will be "NOT COMPLETE".

| DQ Dimension | Information Element | Resource Type |
|--------------|---------------------|---------------|
| Completeness | Occurrence          | Single Record |

### OCCURRENCE ACCURACY OF SINGLE RECORDS

Measure the accuracy of the Occurrence based on the consistency of Coordinates, the conformity of the Scientific Name and the consistency of the Collected Date.

| DQ Dimension | Information Element | Resource Type |
|--------------|---------------------|---------------|
| Accuracy     | Occurrence          | Single Record |

### COORDINATES COMPLETENESS OF MULTI-RECORDS

Measure the proportion of records that have value for all the elements of the Coordinates.

| DQ Dimension | Information Element | Resource Type |
|--------------|---------------------|---------------|
| Completeness | Coordinates         | Multi-Record  |

### COORDINATES CONSISTENCY OF MULTI-RECORDS

Measure the proportion of records where the Coordinates is consistent with the associated country, state/province, county and locality.

# Framework Validation - Proof of Concept

| DQ Dimension | Information Element | Resource Type |
|--------------|---------------------|---------------|
| Consistency  | Coordinates         | Multi-Record  |

# Framework Validation - Proof of Concept

## SCIENTIFIC NAME COMPLETENESS OF MULTI-RECORDS

Measure the proportion of records that have value for all the elements of the Scientific Name.

| DQ Dimension | Information Element | Resource Type |
|--------------|---------------------|---------------|
| Completeness | Scientific Name     | Multi-Record  |

## SCIENTIFIC NAME CONFORMITY OF MULTI-RECORDS

Measure the proportion of records where the Scientific Name values is conform with nomenclature authorities.

| DQ Dimension | Information Element | Resource Type |
|--------------|---------------------|---------------|
| Conformity   | Scientific Name     | Multi-Record  |

## COLLECTED DATE COMPLETENESS OF MULTI-RECORDS

Measure the proportion of records that have value for the Collected Date element.

| DQ Dimension | Information Element | Resource Type |
|--------------|---------------------|---------------|
| Completeness | Collected Date      | Multi-Record  |

## COLLECTED DATE CONSISTENCY OF MULTI-RECORDS

Measure the proportion of records where the Collected Date is consistent with the modified date and the life span of the collector.

| DQ Dimension | Information Element | Resource Type |
|--------------|---------------------|---------------|
| Consistency  | Collected Date      | Multi-Record  |

## OCCURRENCE COMPLETENESS OF MULTI-RECORDS

Measure the proportion of records that have value for all the elements of the Occurrence.

| DQ Dimension | Information Element | Resource Type |
|--------------|---------------------|---------------|
| Completeness | Occurrence          | Multi-Record  |

## OCCURRENCE ACCURACY OF MULTI-RECORDS

Measure the proportion of records where the Coordinates is consistent, the Scientific Name is conforms with nomenclatural authorities and the Collected Date is consistent.

| DQ Dimension | Information Element | Resource Type |
|--------------|---------------------|---------------|
| Accuracy     | Occurrence          | Multi-Record  |



## 1.4. DQ Validation Policy

List of Criteria that are particularly important to rule how data must be presented to be considered fit for use in the Use Case context. Data compliant with these Criteria are fit for use in the defined Use Case context. Making the data compliant with these Criteria will be the target of the DQ Amendment.

### COORDINATES MUST BE COMPLETE

Data with measure of "coordinates completeness of single records" equal "COMPLETE" are COMPLIANT with this Criterion.

| Related Dimension in Context               | Information Element | Resource Type |
|--------------------------------------------|---------------------|---------------|
| Coordinates Completeness of Single Records | Coordinates         | Single Record |

### COORDINATES MUST BE CONSISTENT

Data with measure of "coordinates consistency of single records" equal "CONSISTENT" are COMPLIANT with this Criterion.

| Related Dimension in Context              | Information Element | Resource Type |
|-------------------------------------------|---------------------|---------------|
| Coordinates Consistency of Single Records | Coordinates         | Single Record |

### SCIENTIFIC NAME MUST BE COMPLETE

Data with measure of "scientific name completeness of single records" equal "COMPLETE" are COMPLIANT with this Criterion.

| Related Dimension in Context                   | Information Element | Resource Type |
|------------------------------------------------|---------------------|---------------|
| Scientific Name Completeness of Single Records | Scientific Name     | Single Record |

### SCIENTIFIC NAME MUST BE CONFORM WITH NOMENCLATURAL AUTHORITIES

Data with measure of "scientific name conformity of single records" equal "CONFORM" are COMPLIANT with this Criterion.

| Related Dimension in Context                 | Information Element | Resource Type |
|----------------------------------------------|---------------------|---------------|
| Scientific Name Conformity of Single Records | Scientific Name     | Single Record |

### COLLECTED DATE MUST BE COMPLETE

## Framework Validation - Proof of Concept

Data with measure of "collected date completeness of single records" equal "COMPLETE" are COMPLIANT with this Criterion.

| Related Dimension in Context                  | Information Element | Resource Type |
|-----------------------------------------------|---------------------|---------------|
| Collected Data Completeness of Single Records | Scientific Name     | Single Record |

### COLLECTED DATE MUST BE CONSISTENT

Data with measure of "collected date consistency of single record" equal "CONSISTENT" are COMPLIANT with this Criterion.

| Related Dimension in Context                 | Information Element | Resource Type |
|----------------------------------------------|---------------------|---------------|
| Collected Data Consistency of Single Records | Collected Date      | Single Record |

### OCCURRENCE MUST BE COMPLETE

Data with measure of "occurrence completeness of single records" equal "COMPLETE" are COMPLIANT with this Criterion.

| Related Dimension in Context              | Information Element | Resource Type |
|-------------------------------------------|---------------------|---------------|
| Occurrence Completeness of Single Records | Occurrence          | Single Record |

### OCCURRENCE MUST BE ACCURATE

Data with measure of "occurrence accuracy of single record" equal "ACCURATE" are COMPLIANT with this Criterion.

| Related Dimension in Context          | Information Element | Resource Type |
|---------------------------------------|---------------------|---------------|
| Occurrence Accuracy of Single Records | Occurrence          | Single Record |

### ALL THE MULTI-RECORD RECORDS MUST HAVE COMPLETE COORDINATES

Multi-Record with measure of "coordinates completeness of Multi-Records" equal "100%" are COMPLIANT with this Criterion.

| Related Dimension in Context              | Information Element | Resource Type |
|-------------------------------------------|---------------------|---------------|
| Coordinates Completeness of Multi-Records | Coordinates         | Multi-Record  |

### ALL THE MULTI-RECORD RECORDS MUST HAVE CONSISTENT COORDINATES

## Framework Validation - Proof of Concept

Data with measure of "coordinates consistency of Multi-Records" equal "100%" are COMPLIANT with this Criterion.

| Related Dimension in Context             | Information Element | Resource Type |
|------------------------------------------|---------------------|---------------|
| Coordinates Consistency of Multi-Records | Coordinates         | Multi-Record  |

ALL THE MULTI-RECORD RECORDS MUST HAVE COMPLETE SCIENTIFIC NAME

Data with measure of "scientific name completeness of Multi-Records" equal "100%" are COMPLIANT with this Criterion.

| Related Dimension in Context                  | Information Element | Resource Type |
|-----------------------------------------------|---------------------|---------------|
| Scientific Name Completeness of Multi-Records | Scientific Name     | Multi-Record  |

ALL THE MULTI-RECORD RECORDS MUST HAVE CONFORM SCIENTIFIC NAME

Data with measure of "scientific name conformity of Multi-Records" equal "100%" are COMPLIANT with this Criterion.

| Related Dimension in Context                | Information Element | Resource Type |
|---------------------------------------------|---------------------|---------------|
| Scientific Name Conformity of Multi-Records | Scientific Name     | Multi-Record  |

ALL THE MULTI-RECORD RECORDS MUST HAVE COMPLETE COLLECTED DATE

Data with measure of "collected date completeness of Multi-Records" equal "100%" are COMPLIANT with this Criterion.

| Related Dimension in Context                 | Information Element | Resource Type |
|----------------------------------------------|---------------------|---------------|
| Collected Data Completeness of Multi-Records | Scientific Name     | Multi-Record  |

ALL THE MULTI-RECORD RECORDS MUST HAVE CONSISTENT COLLECTED DATE

Data with measure of "collected date consistency of Multi-Records" equal "100%" are COMPLIANT with this Criterion.

| Related Dimension in Context                | Information Element | Resource Type |
|---------------------------------------------|---------------------|---------------|
| Collected Data Consistency of Multi-Records | Collected Date      | Multi-Record  |

ALL THE MULTI-RECORD RECORDS MUST HAVE COMPLETE OCCURRENCE

Data with measure of "occurrence completeness of Multi-Records" equal "100%" are COMPLIANT with this Criterion.

## Framework Validation - Proof of Concept

| Related Dimension in Context             | Information Element | Resource Type |
|------------------------------------------|---------------------|---------------|
| Occurrence Completeness of Multi-Records | Occurrence          | Multi-Record  |

ALL THE MULTI-RECORD RECORDS MUST HAVE ACCURATE OCCURRENCE

Data with measure of "occurrence accuracy of Multi-Records" equal "100%" are COMPLIANT with this Criterion.

| Related Dimension in Context         | Information Element | Resource Type |
|--------------------------------------|---------------------|---------------|
| Occurrence Accuracy of Multi-Records | Occurrence          | Multi-Record  |

### 1.5. DQ Enhancement Policy

List of Enhancements that are particularly important for making data fitter for use in a particular Use Case context. The DQ Enhancement Policy has as goal to improve the measures of DQ Measurement Policy and consequently make data more compliant with the DQ Validation Policy.

RECOMMENDATION OF SCIENTIFIC NAME BASED ON NOMENCLATURE AUTHORITIES

| DQ Enhancement | Information Element | Resource Type |
|----------------|---------------------|---------------|
| Recommendation | Scientific Name     | Single Record |

RECOMMENDATION OF COLLECTED DATE BASED ON ISO 8601 STANDARD

| DQ Enhancement | Information Element | Resource Type |
|----------------|---------------------|---------------|
| Recommendation | Collected Date      | Single Record |

RECOMMENDATION OF COORDINATES BASED ON THE ASSOCIATED COUNTRY, STATE/PROVINCE, COUNTY AND LOCALITY

| DQ Enhancement | Information Element | Resource Type |
|----------------|---------------------|---------------|
| Recommendation | Coordinates         | Single Record |

ACCEPT ALL RECOMMENDATIONS FOR RECORDS IN THE MULTI-RECORD

| DQ Enhancement | Information Element | Resource Type |
|----------------|---------------------|---------------|
| Correction     | Occurrence          | Multi-Record  |

DISREGARD ALL RECORDS THAT ARE NOT COMPLIANT WITH ALL THE DQ CRITERIA

| DQ Enhancement | Information Element | Resource Type |
|----------------|---------------------|---------------|
|----------------|---------------------|---------------|

# 2. DQ SOLUTIONS

## 2.1. Measurement Methods and Implementations

Description of how and what use to perform the DQ measure of each Dimension in context of the DQ Measurement Policy of the DQ profile. This description may have different formality levels depending the audience: for non-developers, this description supposed to be human readable but taking care to remove all ambiguity that might exist in the Dimension in context description; for developers, this description supposed to follow some standard to enable the software interoperability.

The following examples concern to provide a understandable description of measurements methods for a non-developer audience.

| Dimension in Context                       | Specification                                                                                                                                                                                                             | Mechanism                                                                                                                                                                                                                                                                                                                                                                                                                                                                                                                      |
|--------------------------------------------|---------------------------------------------------------------------------------------------------------------------------------------------------------------------------------------------------------------------------|--------------------------------------------------------------------------------------------------------------------------------------------------------------------------------------------------------------------------------------------------------------------------------------------------------------------------------------------------------------------------------------------------------------------------------------------------------------------------------------------------------------------------------|
| Coordinates Completeness of Single Records | Check if values (disregarding extra spaces) for both <code>dwc:decimalLatitude</code> and <code>dwc:decimalLongitude</code> are different to zero and different to empty. Applicable to Darwin Core based single records. | <p>Name: FP-AKKA Kurator</p> <p>Description: This software produces a data quality report on a set of natural science collections data. The software examines the data records for internal consistency, checks them against external services (such as Geolocate), identifies potential problems, and where possible, proposes corrections that may be applied to the data.</p> <p>Institution: Kurator Project</p> <p>URL: <a href="http://wiki.datakurator.net/web/Kurator">http://wiki.datakurator.net/web/Kurator</a></p> |

## Framework Validation - Proof of Concept

|                                                       |                                                                                                                                                                                                                                                                                                                                                                                                                                                                                                                                               |                                                                                                                                                                                                                                                                                                                                                                                                                                                                                                                                |
|-------------------------------------------------------|-----------------------------------------------------------------------------------------------------------------------------------------------------------------------------------------------------------------------------------------------------------------------------------------------------------------------------------------------------------------------------------------------------------------------------------------------------------------------------------------------------------------------------------------------|--------------------------------------------------------------------------------------------------------------------------------------------------------------------------------------------------------------------------------------------------------------------------------------------------------------------------------------------------------------------------------------------------------------------------------------------------------------------------------------------------------------------------------|
| <p>Coordinates Consistency of Single Records</p>      | <p>Check if dwc:decimalLatitude and dwc:decimalLongitude values are consistent with coordinates ranges (latitudes range from -90 to 90 and longitudes range from -180 to 180) and are consistent with the bounds of dwc:country or close enough (currently defined as 200 km) from the georeference for dwc:country, dwc:stateProvince, dwc:county and dwc:locality. Applicable to Darwin Core based single records.</p> <p>Georeference sources:<br/>GeoLocate   Land data from Natural Earth   Country boundary data from GeoCommunity.</p> | <p>Name: FP-AKKA Kurator</p> <p>Description: This software produces a data quality report on a set of natural science collections data. The software examines the data records for internal consistency, checks them against external services (such as Geolocate), identifies potential problems, and where possible, proposes corrections that may be applied to the data.</p> <p>Institution: Kurator Project</p> <p>URL: <a href="http://wiki.datakurator.net/web/Kurator">http://wiki.datakurator.net/web/Kurator</a></p> |
| <p>Scientific Name Completeness of Single Records</p> | <p>Check if values (disregarding extra spaces) for both dwc:scientificName and dwc:scientificNameAuthorship are different to empty. Applicable to Darwin Core based single records.</p>                                                                                                                                                                                                                                                                                                                                                       | <p>Name: FP-AKKA Kurator</p> <p>Description: This software produces a data quality report on a set of natural science collections data. The software examines the data records for internal consistency, checks them against external services (such as Geolocate), identifies potential problems, and where possible, proposes corrections that may be applied to the data.</p> <p>Institution: Kurator Project</p> <p>URL: <a href="http://wiki.datakurator.net/web/Kurator">http://wiki.datakurator.net/web/Kurator</a></p> |
| <p>Scientific Name Conformity of Single Records</p>   | <p>Check against nomenclature authorities if there is an exact match with both dwc:scientificName and dwc:scientificNameAuthorship values. Applicable to Darwin Core based single records.</p> <p>Nomenclatural authority sources:<br/>Catalog of Life   Global Name Resolver   Global Name Index   GBIF CheckListBank Backbone   IPNI   Index Fungorum   WoRMS.</p>                                                                                                                                                                          | <p>Name: FP-AKKA Kurator</p> <p>Description: This software produces a data quality report on a set of natural science collections data. The software examines the data records for internal consistency, checks them against external services (such as Geolocate), identifies potential problems, and where possible, proposes corrections that may be applied to the data.</p> <p>Institution: Kurator Project</p> <p>URL: <a href="http://wiki.datakurator.net/web/Kurator">http://wiki.datakurator.net/web/Kurator</a></p> |

## Framework Validation - Proof of Concept

|                                                      |                                                                                                                                                                                                                                                                                                                        |                                                                                                                                                                                                                                                                                                                                                                                                                                                                                                                                |
|------------------------------------------------------|------------------------------------------------------------------------------------------------------------------------------------------------------------------------------------------------------------------------------------------------------------------------------------------------------------------------|--------------------------------------------------------------------------------------------------------------------------------------------------------------------------------------------------------------------------------------------------------------------------------------------------------------------------------------------------------------------------------------------------------------------------------------------------------------------------------------------------------------------------------|
| <p>Collected Date Completeness of Single Records</p> | <p>Check if value (disregarding extra spaces) for dwc:eventDate is different to empty. Applicable to Darwin Core based single records.</p>                                                                                                                                                                             | <p>Name: FP-AKKA Kurator</p> <p>Description: This software produces a data quality report on a set of natural science collections data. The software examines the data records for internal consistency, checks them against external services (such as Geolocate), identifies potential problems, and where possible, proposes corrections that may be applied to the data.</p> <p>Institution: Kurator Project</p> <p>URL: <a href="http://wiki.datakurator.net/web/Kurator">http://wiki.datakurator.net/web/Kurator</a></p> |
| <p>Collected Date Consistency of Single Records</p>  | <p>Check if dwc:eventDate value is correctly formatted according to ISO 8601 standard and is before dwc:modified and within life span of dwc:collectedBy. Applicable to Darwin Core based single records.</p> <p>Life span of collectors sources:<br/>Harvard List of Botanists   FilteredPush Entomologists List.</p> | <p>Name: FP-AKKA Kurator</p> <p>Description: This software produces a data quality report on a set of natural science collections data. The software examines the data records for internal consistency, checks them against external services (such as Geolocate), identifies potential problems, and where possible, proposes corrections that may be applied to the data.</p> <p>Institution: Kurator Project</p> <p>URL: <a href="http://wiki.datakurator.net/web/Kurator">http://wiki.datakurator.net/web/Kurator</a></p> |
| <p>Occurrence Completeness of Single Records</p>     | <p>Check if values (disregarding extra spaces) for both dwc:decimalLatitude and dwc:decimalLongitude are different to zero or empty and values for dwc:eventDate, dwc:scientificName and dwc:scientificNameAuthorship are different to empty. Applicable to Darwin Core based single records.</p>                      | <p>Name: FP-AKKA Kurator</p> <p>Description: This software produces a data quality report on a set of natural science collections data. The software examines the data records for internal consistency, checks them against external services (such as Geolocate), identifies potential problems, and where possible, proposes corrections that may be applied to the data.</p> <p>Institution: Kurator Project</p> <p>URL: <a href="http://wiki.datakurator.net/web/Kurator">http://wiki.datakurator.net/web/Kurator</a></p> |

## Framework Validation - Proof of Concept

|                                                         |                                                                                                                                                                                                                                                                                                                                                                                                                                                                                                                                                                                                                                                                                                                                                                                                                                                                                                                                                                                                                                                                                                                  |                                                                                                                                                                                                                                                                                                                                                                                                                                                                                                                                                            |
|---------------------------------------------------------|------------------------------------------------------------------------------------------------------------------------------------------------------------------------------------------------------------------------------------------------------------------------------------------------------------------------------------------------------------------------------------------------------------------------------------------------------------------------------------------------------------------------------------------------------------------------------------------------------------------------------------------------------------------------------------------------------------------------------------------------------------------------------------------------------------------------------------------------------------------------------------------------------------------------------------------------------------------------------------------------------------------------------------------------------------------------------------------------------------------|------------------------------------------------------------------------------------------------------------------------------------------------------------------------------------------------------------------------------------------------------------------------------------------------------------------------------------------------------------------------------------------------------------------------------------------------------------------------------------------------------------------------------------------------------------|
| <p><b>Occurrence Accuracy of Single Records</b></p>     | <p>Check if dwc:decimalLatitude and dwc:decimalLongitude values are consistent with coordinates ranges (latitudes range from -90 to 90 and longitudes range from -180 to 180) and are consistent with the bounds of dwc:country or close enough (currently defined as 200 km) to the georeference for dwc:country, dwc:stateProvince, dwc:county and dwc:locality and if dwc:eventDate value is correctly formatted according to ISO 8601 standard and is before dwc:modified and within life span of dwc:collectedBy and if there is an exact match with both dwc:scientificName and dwc:scientificNameAuthorship values with nomenclature authorities. Applicable to Darwin Core based single records.</p> <p>Georeference sources:<br/>GeoLocate   Land data from Natural Earth   Country boundary data from GeoCommunity.</p> <p>Life span of collectors sources:<br/>Harvard List of Botanists   FilteredPush Entomologists List.</p> <p>Nomenclatural authority sources:<br/>Catalog of Life   Global Name Resolver   Global Name Index   GBIF CheckListBank Backbone   IPNI   Index Fungorum   WoRMS.</p> | <p><b>Name:</b> FP-AKKA Kurator</p> <p><b>Description:</b> This software produces a data quality report on a set of natural science collections data. The software examines the data records for internal consistency, checks them against external services (such as Geolocate), identifies potential problems, and where possible, proposes corrections that may be applied to the data.</p> <p><b>Institution:</b> Kurator Project</p> <p><b>URL:</b> <a href="http://wiki.datakurator.net/web/Kurator">http://wiki.datakurator.net/web/Kurator</a></p> |
| <p><b>Coordinates Completeness of Multi-Records</b></p> | <p>Calculate the proportion of records in Multi-Record with values (disregarding extra spaces) different to zero and different to empty for both dwc:decimalLatitude and dwc:decimalLongitude. Applicable to Multi-Records of Darwin Core based records.</p>                                                                                                                                                                                                                                                                                                                                                                                                                                                                                                                                                                                                                                                                                                                                                                                                                                                     | <p><b>Name:</b> Biodiversity Data Quality Toolkit</p> <p><b>Description:</b> This toolkit provides an Application Programming Interface (API) for ad hoc use by applications that are able to consume Representational State Transfer (REST) web services. This toolkit provides mechanisms to measure and validate DQ of both Multi-Records and single records based on the Darwin Core standard.</p> <p><b>Institution:</b> Biocomp</p> <p><b>URL:</b> <a href="http://toolkit.bdq.biocomp.org.br:3020">http://toolkit.bdq.biocomp.org.br:3020</a></p>   |



## Framework Validation - Proof of Concept

|                                                      |                                                                                                                                                                                                                                                                                                                                                                                                                                                                                                                                                                                |                                                                                                                                                                                                                                                                                                                                                                                                                                                                                                                              |
|------------------------------------------------------|--------------------------------------------------------------------------------------------------------------------------------------------------------------------------------------------------------------------------------------------------------------------------------------------------------------------------------------------------------------------------------------------------------------------------------------------------------------------------------------------------------------------------------------------------------------------------------|------------------------------------------------------------------------------------------------------------------------------------------------------------------------------------------------------------------------------------------------------------------------------------------------------------------------------------------------------------------------------------------------------------------------------------------------------------------------------------------------------------------------------|
| <p>Coordinates Consistency of Multi-Records</p>      | <p>Calculate the proportion of records dwc:decimalLatitude and dwc:decimalLongitude values consistent with coordinates ranges (latitudes range from -90 to 90 and longitudes range from -180 to 180) and are consistent with the bounds of dwc:country or close enough (currently defined as 200 km) from the georeference for dwc:country, dwc:stateProvince, dwc:county and dwc:locality. Applicable to Multi-Records of Darwin Core based records.</p> <p>Georeference sources:<br/>GeoLocate   Land data from Natural Earth   Country boundary data from GeoCommunity.</p> | <p>Name: Biodiversity Data Quality Toolkit</p> <p>Description: This toolkit provides an Application Programming Interface (API) for ad hoc use by applications that are able to consume Representational State Transfer (REST) web services. This toolkit provides mechanisms to measure and validate DQ of both Multi-Records and single records based on the Darwin Core standard.</p> <p>Institution: Biocomp</p> <p>URL: <a href="http://toolkit.bdq.biocomp.org.br:3020">http://toolkit.bdq.biocomp.org.br:3020</a></p> |
| <p>Scientific Name Completeness of Multi-Records</p> | <p>Calculate the proportion of records in Multi-Record with values (disregarding extra spaces) different to empty for both dwc:scientificName and dwc:scientificNameAuthorship. Applicable to Multi-Records of Darwin Core based records.</p>                                                                                                                                                                                                                                                                                                                                  | <p>Name: Biodiversity Data Quality Toolkit</p> <p>Description: This toolkit provides an Application Programming Interface (API) for ad hoc use by applications that are able to consume Representational State Transfer (REST) web services. This toolkit provides mechanisms to measure and validate DQ of both Multi-Records and single records based on the Darwin Core standard.</p> <p>Institution: Biocomp</p> <p>URL: <a href="http://toolkit.bdq.biocomp.org.br:3020">http://toolkit.bdq.biocomp.org.br:3020</a></p> |
| <p>Scientific Name Conformity of Multi-Records</p>   | <p>Calculate the proportion of records with an exact match of both dwc:scientificName and dwc:scientificNameAuthorship values with nomenclatural authorities. Applicable to Multi-Records of Darwin Core based records.</p> <p>Nomenclatural authority sources:<br/>Catalog of Life   Global Name Resolver   Global Name Index   GBIF CheckListBank Backbone   IPNI   Index Fungorum   WoRMS.</p>                                                                                                                                                                              | <p>Name: Biodiversity Data Quality Toolkit</p> <p>Description: This toolkit provides an Application Programming Interface (API) for ad hoc use by applications that are able to consume Representational State Transfer (REST) web services. This toolkit provides mechanisms to measure and validate DQ of both Multi-Records and single records based on the Darwin Core standard.</p> <p>Institution: Biocomp</p> <p>URL: <a href="http://toolkit.bdq.biocomp.org.br:3020">http://toolkit.bdq.biocomp.org.br:3020</a></p> |

## Framework Validation - Proof of Concept

|                                              |                                                                                                                                                                                                                                                                                                                                                              |                                                                                                                                                                                                                                                                                                                                                                                                                                                                                                                              |
|----------------------------------------------|--------------------------------------------------------------------------------------------------------------------------------------------------------------------------------------------------------------------------------------------------------------------------------------------------------------------------------------------------------------|------------------------------------------------------------------------------------------------------------------------------------------------------------------------------------------------------------------------------------------------------------------------------------------------------------------------------------------------------------------------------------------------------------------------------------------------------------------------------------------------------------------------------|
| Collected Date Completeness of Multi-Records | Calculate the proportion of records in Multi-Record that have the dwc:eventDate value (disregarding extra spaces) different to empty. Applicable to Multi-Records of Darwin Core based records.                                                                                                                                                              | <p>Name: Biodiversity Data Quality Toolkit</p> <p>Description: This toolkit provides an Application Programming Interface (API) for ad hoc use by applications that are able to consume Representational State Transfer (REST) web services. This toolkit provides mechanisms to measure and validate DQ of both Multi-Records and single records based on the Darwin Core standard.</p> <p>Institution: Biocomp</p> <p>URL: <a href="http://toolkit.bdq.biocomp.org.br:3020">http://toolkit.bdq.biocomp.org.br:3020</a></p> |
| Collected Date Consistency of Multi-Records  | Calculate the proportion of dwc:eventDate value records that are correctly formatted according to ISO 8601 standard and that are before dwc:modified and within life span of collector. Applicable to Multi-Records of Darwin Core based records.<br><br>Life span of collectors sources:<br>Harvard List of Botanists   FilteredPush<br>Entomologists List. | <p>Name: Biodiversity Data Quality Toolkit</p> <p>Description: This toolkit provides an Application Programming Interface (API) for ad hoc use by applications that are able to consume Representational State Transfer (REST) web services. This toolkit provides mechanisms to measure and validate DQ of both Multi-Records and single records based on the Darwin Core standard.</p> <p>Institution: Biocomp</p> <p>URL: <a href="http://toolkit.bdq.biocomp.org.br:3020">http://toolkit.bdq.biocomp.org.br:3020</a></p> |
| Occurrence Completeness of Multi-Records     | Calculate the proportion of records with values (disregarding extra spaces) for both dwc:decimalLatitude and dwc:decimalLongitude that are different to zero or empty and values for dwc:eventDate, dwc:scientificName and dwc:scientificNameAuthorship that are different to empty. Applicable to Multi-Records of Darwin Core based records.               | <p>Name: Biodiversity Data Quality Toolkit</p> <p>Description: This toolkit provides an Application Programming Interface (API) for ad hoc use by applications that are able to consume Representational State Transfer (REST) web services. This toolkit provides mechanisms to measure and validate DQ of both Multi-Records and single records based on the Darwin Core standard.</p> <p>Institution: Biocomp</p> <p>URL: <a href="http://toolkit.bdq.biocomp.org.br:3020">http://toolkit.bdq.biocomp.org.br:3020</a></p> |

|                                             |                                                                                                                                                                                                                                                                                                                                                                                                                                                                                                                                                                                                                                                                                                                                                                                                                                                                                                                                                                                                                                                                                                                                                                           |                                                                                                                                                                                                                                                                                                                                                                                                                                                                                                                              |
|---------------------------------------------|---------------------------------------------------------------------------------------------------------------------------------------------------------------------------------------------------------------------------------------------------------------------------------------------------------------------------------------------------------------------------------------------------------------------------------------------------------------------------------------------------------------------------------------------------------------------------------------------------------------------------------------------------------------------------------------------------------------------------------------------------------------------------------------------------------------------------------------------------------------------------------------------------------------------------------------------------------------------------------------------------------------------------------------------------------------------------------------------------------------------------------------------------------------------------|------------------------------------------------------------------------------------------------------------------------------------------------------------------------------------------------------------------------------------------------------------------------------------------------------------------------------------------------------------------------------------------------------------------------------------------------------------------------------------------------------------------------------|
| <p>Occurrence Accuracy of Multi-Records</p> | <p>Calculate the proportion of records in Multi-Record with values for dwc:decimalLatitude and dwc:decimalLongitude that are consistent with coordinates ranges (latitudes range from -90 to 90 and longitudes range from -180 to 180) and are consistent with the bounds of dwc:country or close enough (currently defined as 200 km) from the georeference for dwc:country, dwc:stateProvince, dwc:county and dwc:locality and value for dwc:eventDate is correctly formatted according to ISO 8601 standard and is before dwc:modified and within life span of dwc:collectedBy and there is an exact match with both dwc:scientificName and dwc:scientificNameAuthorship values with nomenclature authorities. Applicable to Darwin Core based single records.</p> <p>Georeference sources:<br/>GeoLocate   Land data from Natural Earth   Country boundary data from GeoCommunity.</p> <p>Life span of collectors sources:<br/>Harvard List of Botanists   FilteredPush Entomologists List.</p> <p>Nomenclatural authority sources:<br/>Catalog of Life   Global Name Resolver   Global Name Index   GBIF CheckListBank Backbone   IPNI   Index Fungorum   WoRMS.</p> | <p>Name: Biodiversity Data Quality Toolkit</p> <p>Description: This toolkit provides an Application Programming Interface (API) for ad hoc use by applications that are able to consume Representational State Transfer (REST) web services. This toolkit provides mechanisms to measure and validate DQ of both Multi-Records and single records based on the Darwin Core standard.</p> <p>Institution: Biocomp</p> <p>URL: <a href="http://toolkit.bdq.biocomp.org.br:3020">http://toolkit.bdq.biocomp.org.br:3020</a></p> |
|---------------------------------------------|---------------------------------------------------------------------------------------------------------------------------------------------------------------------------------------------------------------------------------------------------------------------------------------------------------------------------------------------------------------------------------------------------------------------------------------------------------------------------------------------------------------------------------------------------------------------------------------------------------------------------------------------------------------------------------------------------------------------------------------------------------------------------------------------------------------------------------------------------------------------------------------------------------------------------------------------------------------------------------------------------------------------------------------------------------------------------------------------------------------------------------------------------------------------------|------------------------------------------------------------------------------------------------------------------------------------------------------------------------------------------------------------------------------------------------------------------------------------------------------------------------------------------------------------------------------------------------------------------------------------------------------------------------------------------------------------------------------|

## 2.2. Validation Methods and Implementations

Description of how and what use to perform the DQ validation of each Criterion of the DQ Validation Policy of the DQ profile. This description may have different formality levels depending the audience: for non-developers, this description supposed be human readable but taking care to remove any ambiguity existent in the Criterion description; for developers, this description supposed to follow some standard to enable the software interoperability.

The following examples concern to provide a comprehensive description of validations methods for a non-developer audience.

| Criterion in Context | Specification | Mechanism |
|----------------------|---------------|-----------|
|----------------------|---------------|-----------|

## Framework Validation - Proof of Concept

|                                  |                                                                                                                                                                                                                                                                                                                                                                                                                                                                                                                                          |                                                                                                                                                                                                                                                                                                                                                                                                                                                                                                                         |
|----------------------------------|------------------------------------------------------------------------------------------------------------------------------------------------------------------------------------------------------------------------------------------------------------------------------------------------------------------------------------------------------------------------------------------------------------------------------------------------------------------------------------------------------------------------------------------|-------------------------------------------------------------------------------------------------------------------------------------------------------------------------------------------------------------------------------------------------------------------------------------------------------------------------------------------------------------------------------------------------------------------------------------------------------------------------------------------------------------------------|
| Coordinates must be complete     | Check if values (disregarding extra spaces) for both dwc:decimalLatitude and dwc:decimalLongitude are different to zero and different to empty. Applicable to Darwin Core based single records.                                                                                                                                                                                                                                                                                                                                          | Name: FP-AKKA Kurator<br><br>Description: This software produces a data quality report on a set of natural science collections data. The software examines the data records for internal consistency, checks them against external services (such as Geolocate), identifies potential problems, and where possible, proposes corrections that may be applied to the data.<br><br>Institution: Kurator Project<br><br>URL: <a href="http://wiki.datakurator.net/web/Kurator">http://wiki.datakurator.net/web/Kurator</a> |
| Coordinates must be consistent   | Check if dwc:decimalLatitude and dwc:decimalLongitude values are consistent with coordinates ranges (latitudes range from -90 to 90 and longitudes range from -180 to 180) and are consistent with the bounds of dwc:country or close enough (currently defined as 200 km) from the georeference for dwc:country, dwc:stateProvince, dwc:county and dwc:locality. Applicable to Darwin Core based single records.<br><br>Georeference sources:<br>GeoLocate   Land data from Natural Earth  <br>Country boundary data from GeoCommunity. | Name: FP-AKKA Kurator<br><br>Description: This software produces a data quality report on a set of natural science collections data. The software examines the data records for internal consistency, checks them against external services (such as Geolocate), identifies potential problems, and where possible, proposes corrections that may be applied to the data.<br><br>Institution: Kurator Project<br><br>URL: <a href="http://wiki.datakurator.net/web/Kurator">http://wiki.datakurator.net/web/Kurator</a> |
| Scientific Name must be complete | Check if values (disregarding extra spaces) for both dwc:scientificName and dwc:scientificNameAuthorship are different to empty. Applicable to Darwin Core based single records.                                                                                                                                                                                                                                                                                                                                                         | Name: FP-AKKA Kurator<br><br>Description: This software produces a data quality report on a set of natural science collections data. The software examines the data records for internal consistency, checks them against external services (such as Geolocate), identifies potential problems, and where possible, proposes corrections that may be applied to the data.<br><br>Institution: Kurator Project<br><br>URL: <a href="http://wiki.datakurator.net/web/Kurator">http://wiki.datakurator.net/web/Kurator</a> |

## Framework Validation - Proof of Concept

|                                                                       |                                                                                                                                                                                                                                                                                                                                                                      |                                                                                                                                                                                                                                                                                                                                                                                                                                                                                                                                |
|-----------------------------------------------------------------------|----------------------------------------------------------------------------------------------------------------------------------------------------------------------------------------------------------------------------------------------------------------------------------------------------------------------------------------------------------------------|--------------------------------------------------------------------------------------------------------------------------------------------------------------------------------------------------------------------------------------------------------------------------------------------------------------------------------------------------------------------------------------------------------------------------------------------------------------------------------------------------------------------------------|
| <p>Scientific Name must be conform with nomenclatural authorities</p> | <p>Check against nomenclature authorities if there is an exact match with both dwc:scientificName and dwc:scientificNameAuthorship values. Applicable to Darwin Core based single records.</p> <p>Nomenclatural authority sources:<br/>Catalog of Life   Global Name Resolver   Global Name Index   GBIF CheckListBank Backbone   IPNI   Index Fungorum   WoRMS.</p> | <p>Name: FP-AKKA Kurator</p> <p>Description: This software produces a data quality report on a set of natural science collections data. The software examines the data records for internal consistency, checks them against external services (such as Geolocate), identifies potential problems, and where possible, proposes corrections that may be applied to the data.</p> <p>Institution: Kurator Project</p> <p>URL: <a href="http://wiki.datakurator.net/web/Kurator">http://wiki.datakurator.net/web/Kurator</a></p> |
| <p>Collected Date must be complete</p>                                | <p>Check if value (disregarding extra spaces) for dwc:eventDate is different to empty. Applicable to Darwin Core based single records.</p>                                                                                                                                                                                                                           | <p>Name: FP-AKKA Kurator</p> <p>Description: This software produces a data quality report on a set of natural science collections data. The software examines the data records for internal consistency, checks them against external services (such as Geolocate), identifies potential problems, and where possible, proposes corrections that may be applied to the data.</p> <p>Institution: Kurator Project</p> <p>URL: <a href="http://wiki.datakurator.net/web/Kurator">http://wiki.datakurator.net/web/Kurator</a></p> |
| <p>Collected Date must be consistent</p>                              | <p>Check if dwc:eventDate value is correctly formatted according to ISO 8601 standard and is before dwc:modified and within life span of dwc:collectedBy. Applicable to Darwin Core based single records.</p> <p>Life span of collectors sources:<br/>Harvard List of Botanists   FilteredPush Entomologists List.</p>                                               | <p>Name: FP-AKKA Kurator</p> <p>Description: This software produces a data quality report on a set of natural science collections data. The software examines the data records for internal consistency, checks them against external services (such as Geolocate), identifies potential problems, and where possible, proposes corrections that may be applied to the data.</p> <p>Institution: Kurator Project</p> <p>URL: <a href="http://wiki.datakurator.net/web/Kurator">http://wiki.datakurator.net/web/Kurator</a></p> |

## Framework Validation - Proof of Concept

|                                    |                                                                                                                                                                                                                                                                                                                                                                                                                                                                                                                                                                                                                                                                                                                                                                                                                                                                                                                                                                                                                                                                                                                  |                                                                                                                                                                                                                                                                                                                                                                                                                                                                                                                                |
|------------------------------------|------------------------------------------------------------------------------------------------------------------------------------------------------------------------------------------------------------------------------------------------------------------------------------------------------------------------------------------------------------------------------------------------------------------------------------------------------------------------------------------------------------------------------------------------------------------------------------------------------------------------------------------------------------------------------------------------------------------------------------------------------------------------------------------------------------------------------------------------------------------------------------------------------------------------------------------------------------------------------------------------------------------------------------------------------------------------------------------------------------------|--------------------------------------------------------------------------------------------------------------------------------------------------------------------------------------------------------------------------------------------------------------------------------------------------------------------------------------------------------------------------------------------------------------------------------------------------------------------------------------------------------------------------------|
| <p>Occurrence must be complete</p> | <p>Check if values (disregarding extra spaces) for both dwc:decimalLatitude and dwc:decimalLongitude are different to zero or empty and values for dwc:eventDate, dwc:scientificName and dwc:scientificNameAuthorship are different to empty. Applicable to Darwin Core based single records.</p>                                                                                                                                                                                                                                                                                                                                                                                                                                                                                                                                                                                                                                                                                                                                                                                                                | <p>Name: FP-AKKA Kurator</p> <p>Description: This software produces a data quality report on a set of natural science collections data. The software examines the data records for internal consistency, checks them against external services (such as Geolocate), identifies potential problems, and where possible, proposes corrections that may be applied to the data.</p> <p>Institution: Kurator Project</p> <p>URL: <a href="http://wiki.datakurator.net/web/Kurator">http://wiki.datakurator.net/web/Kurator</a></p> |
| <p>Occurrence must be accurate</p> | <p>Check if dwc:decimalLatitude and dwc:decimalLongitude values are consistent with coordinates ranges (latitudes range from -90 to 90 and longitudes range from -180 to 180) and are consistent with the bounds of dwc:country or close enough (currently defined as 200 km) to the georeference for dwc:country, dwc:stateProvince, dwc:county and dwc:locality and if dwc:eventDate value is correctly formatted according to ISO 8601 standard and is before dwc:modified and within life span of dwc:collectedBy and if there is an exact match with both dwc:scientificName and dwc:scientificNameAuthorship values with nomenclature authorities. Applicable to Darwin Core based single records.</p> <p>Georeference sources:<br/>GeoLocate   Land data from Natural Earth   Country boundary data from GeoCommunity.</p> <p>Life span of collectors sources:<br/>Harvard List of Botanists   FilteredPush Entomologists List.</p> <p>Nomenclatural authority sources:<br/>Catalog of Life   Global Name Resolver   Global Name Index   GBIF CheckListBank Backbone   IPNI   Index Fungorum   WoRMS.</p> | <p>Name: FP-AKKA Kurator</p> <p>Description: This software produces a data quality report on a set of natural science collections data. The software examines the data records for internal consistency, checks them against external services (such as Geolocate), identifies potential problems, and where possible, proposes corrections that may be applied to the data.</p> <p>Institution: Kurator Project</p> <p>URL: <a href="http://wiki.datakurator.net/web/Kurator">http://wiki.datakurator.net/web/Kurator</a></p> |

|                                                                        |                                                                                                                                                                                                                                                                                                                                                                                                                                                                                                                                                                                             |                                                                                                                                                                                                                                                                                                                                                                                                                                                                                                                              |
|------------------------------------------------------------------------|---------------------------------------------------------------------------------------------------------------------------------------------------------------------------------------------------------------------------------------------------------------------------------------------------------------------------------------------------------------------------------------------------------------------------------------------------------------------------------------------------------------------------------------------------------------------------------------------|------------------------------------------------------------------------------------------------------------------------------------------------------------------------------------------------------------------------------------------------------------------------------------------------------------------------------------------------------------------------------------------------------------------------------------------------------------------------------------------------------------------------------|
| <p>All the Multi-Record records must have complete Coordinates</p>     | <p>Check if the proportion of records in Multi-Record with values (disregarding extra spaces) different to zero and different to empty for both dwc:decimalLatitude and dwc:decimalLongitude is equal 100%. Applicable to Multi-Records of Darwin Core based records.</p>                                                                                                                                                                                                                                                                                                                   | <p>Name: Biodiversity Data Quality Toolkit</p> <p>Description: This toolkit provides an Application Programming Interface (API) for ad hoc use by applications that are able to consume Representational State Transfer (REST) web services. This toolkit provides mechanisms to measure and validate DQ of both Multi-Records and single records based on the Darwin Core standard.</p> <p>Institution: Biocomp</p> <p>URL: <a href="http://toolkit.bdq.biocomp.org.br:3020">http://toolkit.bdq.biocomp.org.br:3020</a></p> |
| <p>All the Multi-Record records must have consistent Coordinates</p>   | <p>Check if the proportion of records dwc:decimalLatitude and dwc:decimalLongitude values consistent with coordinates ranges (latitudes range from -90 to 90 and longitudes range from -180 to 180) and are consistent with the bounds of dwc:country or close enough (currently defined as 200 km) from the georeference for dwc:country, dwc:stateProvince, dwc:county and dwc:locality is equal 100%. Applicable to Multi-Records of Darwin Core based records.</p> <p>Georeference sources:<br/>GeoLocate   Land data from Natural Earth   Country boundary data from GeoCommunity.</p> | <p>Name: Biodiversity Data Quality Toolkit</p> <p>Description: This toolkit provides an Application Programming Interface (API) for ad hoc use by applications that are able to consume Representational State Transfer (REST) web services. This toolkit provides mechanisms to measure and validate DQ of both Multi-Records and single records based on the Darwin Core standard.</p> <p>Institution: Biocomp</p> <p>URL: <a href="http://toolkit.bdq.biocomp.org.br:3020">http://toolkit.bdq.biocomp.org.br:3020</a></p> |
| <p>All the Multi-Record records must have complete Scientific Name</p> | <p>Check if the proportion of records in Multi-Record with values (disregarding extra spaces) different to empty for both dwc:scientificName and dwc:scientificNameAuthorship is equal 100%. Applicable to Multi-Records of Darwin Core based records.</p>                                                                                                                                                                                                                                                                                                                                  | <p>Name: Biodiversity Data Quality Toolkit</p> <p>Description: This toolkit provides an Application Programming Interface (API) for ad hoc use by applications that are able to consume Representational State Transfer (REST) web services. This toolkit provides mechanisms to measure and validate DQ of both Multi-Records and single records based on the Darwin Core standard.</p> <p>Institution: Biocomp</p> <p>URL: <a href="http://toolkit.bdq.biocomp.org.br:3020">http://toolkit.bdq.biocomp.org.br:3020</a></p> |

## Framework Validation - Proof of Concept

|                                                                         |                                                                                                                                                                                                                                                                                                                                                                                                                |                                                                                                                                                                                                                                                                                                                                                                                                                                                                                                                              |
|-------------------------------------------------------------------------|----------------------------------------------------------------------------------------------------------------------------------------------------------------------------------------------------------------------------------------------------------------------------------------------------------------------------------------------------------------------------------------------------------------|------------------------------------------------------------------------------------------------------------------------------------------------------------------------------------------------------------------------------------------------------------------------------------------------------------------------------------------------------------------------------------------------------------------------------------------------------------------------------------------------------------------------------|
| <p>All the Multi-Record records must have conform Scientific Name</p>   | <p>Check if the proportion of records with an exact match of both dwc:scientificName and dwc:scientificNameAuthorship values with nomenclatural authorities is equal 100%. Applicable to Multi-Records of Darwin Core based records.</p> <p>Nomenclatural authority sources:<br/>Catalog of Life   Global Name Resolver   Global Name Index   GBIF CheckListBank Backbone   IPNI   Index Fungorum   WoRMS.</p> | <p>Name: Biodiversity Data Quality Toolkit</p> <p>Description: This toolkit provides an Application Programming Interface (API) for ad hoc use by applications that are able to consume Representational State Transfer (REST) web services. This toolkit provides mechanisms to measure and validate DQ of both Multi-Records and single records based on the Darwin Core standard.</p> <p>Institution: Biocomp</p> <p>URL: <a href="http://toolkit.bdq.biocomp.org.br:3020">http://toolkit.bdq.biocomp.org.br:3020</a></p> |
| <p>All the Multi-Record records must have complete Collected Date</p>   | <p>Check if the proportion of records in Multi-Record that have the dwc:eventDate value (disregarding extra spaces) different to empty is equal 100%. Applicable to Multi-Records of Darwin Core based records.</p>                                                                                                                                                                                            | <p>Name: Biodiversity Data Quality Toolkit</p> <p>Description: This toolkit provides an Application Programming Interface (API) for ad hoc use by applications that are able to consume Representational State Transfer (REST) web services. This toolkit provides mechanisms to measure and validate DQ of both Multi-Records and single records based on the Darwin Core standard.</p> <p>Institution: Biocomp</p> <p>URL: <a href="http://toolkit.bdq.biocomp.org.br:3020">http://toolkit.bdq.biocomp.org.br:3020</a></p> |
| <p>All the Multi-Record records must have consistent Collected Date</p> | <p>Check if the proportion of dwc:eventDate value records that are correctly formatted according to ISO 8601 standard and that are before dwc:modified and within life span of collector is equal 100%. Applicable to Multi-Records of Darwin Core based records.</p> <p>Life span of collectors sources:<br/>Harvard List of Botanists   FilteredPush Entomologists List.</p>                                 | <p>Name: Biodiversity Data Quality Toolkit</p> <p>Description: This toolkit provides an Application Programming Interface (API) for ad hoc use by applications that are able to consume Representational State Transfer (REST) web services. This toolkit provides mechanisms to measure and validate DQ of both Multi-Records and single records based on the Darwin Core standard.</p> <p>Institution: Biocomp</p> <p>URL: <a href="http://toolkit.bdq.biocomp.org.br:3020">http://toolkit.bdq.biocomp.org.br:3020</a></p> |



|                                                                   |                                                                                                                                                                                                                                                                                                                                                                                                                                                                                                                                                                                                                                                                                                                                                                                                                                                                                                                                                                                                                                                                                                                                                                                        |                                                                                                                                                                                                                                                                                                                                                                                                                                                                                                                              |
|-------------------------------------------------------------------|----------------------------------------------------------------------------------------------------------------------------------------------------------------------------------------------------------------------------------------------------------------------------------------------------------------------------------------------------------------------------------------------------------------------------------------------------------------------------------------------------------------------------------------------------------------------------------------------------------------------------------------------------------------------------------------------------------------------------------------------------------------------------------------------------------------------------------------------------------------------------------------------------------------------------------------------------------------------------------------------------------------------------------------------------------------------------------------------------------------------------------------------------------------------------------------|------------------------------------------------------------------------------------------------------------------------------------------------------------------------------------------------------------------------------------------------------------------------------------------------------------------------------------------------------------------------------------------------------------------------------------------------------------------------------------------------------------------------------|
| <p>All the Multi-Record records must have complete Occurrence</p> | <p>Check if the proportion of records with values (disregarding extra spaces) for both dwc:decimalLatitude and dwc:decimalLongitude that are different to zero or empty and values for dwc:eventDate, dwc:scientificName and dwc:scientificNameAuthorship that are different to empty is equal 100%. Applicable to Multi-Records of Darwin Core based records.</p>                                                                                                                                                                                                                                                                                                                                                                                                                                                                                                                                                                                                                                                                                                                                                                                                                     | <p>Name: Biodiversity Data Quality Toolkit</p> <p>Description: This toolkit provides an Application Programming Interface (API) for ad hoc use by applications that are able to consume Representational State Transfer (REST) web services. This toolkit provides mechanisms to measure and validate DQ of both Multi-Records and single records based on the Darwin Core standard.</p> <p>Institution: Biocomp</p> <p>URL: <a href="http://toolkit.bdq.biocomp.org.br:3020">http://toolkit.bdq.biocomp.org.br:3020</a></p> |
| <p>All the Multi-Record records must have accurate Occurrence</p> | <p>Check if the proportion of records in Multi-Record with values for dwc:decimalLatitude and dwc:decimalLongitude that are consistent with coordinates ranges (latitudes range from -90 to 90 and longitudes range from -180 to 180) and are consistent with the bounds of dwc:country or close enough (currently defined as 200 km) from the georeference for dwc:country, dwc:stateProvince, dwc:county and dwc:locality and value for dwc:eventDate is correctly formatted according to ISO 8601 standard and is before dwc:modified and within life span of dwc:collectedBy and there is an exact match with both dwc:scientificName and dwc:scientificNameAuthorship values with nomenclature authorities is equal 100%. Applicable to Darwin Core based single records.</p> <p>Georeference sources:<br/>GeoLocate   Land data from Natural Earth   Country boundary data from GeoCommunity.</p> <p>Life span of collectors sources:<br/>Harvard List of Botanists   FilteredPush Entomologists List.</p> <p>Nomenclatural authority sources:<br/>Catalog of Life   Global Name Resolver   Global Name Index   GBIF CheckListBank Backbone   IPNI   Index Fungorum   WoRMS.</p> | <p>Name: Biodiversity Data Quality Toolkit</p> <p>Description: This toolkit provides an Application Programming Interface (API) for ad hoc use by applications that are able to consume Representational State Transfer (REST) web services. This toolkit provides mechanisms to measure and validate DQ of both Multi-Records and single records based on the Darwin Core standard.</p> <p>Institution: Biocomp</p> <p>URL: <a href="http://toolkit.bdq.biocomp.org.br:3020">http://toolkit.bdq.biocomp.org.br:3020</a></p> |

### 2.3. Enhancement Methods and Implementations

Description of how and what to use to perform the DQ Amendment of each Enhancement of the DQ Enhancement Policy of the DQ profile. This description may have different formality levels depending the audience: for non-developers, this description supposed be human readable but taking care to remove any ambiguity existent in the Enhancement description; for developers, this description supposed to follow some standard to enable the software interoperability.

The following examples concern to provide a comprehensive description of enhancement methods for a non-developer audience.

| Enhancement in Context                                                     | Specification                                                                                                                                                                                                                                                                                                                                                                                                                                                                                                                                                                                                                                                                                                                               | Mechanism                                                                                                                                                                                                                                                                                                                                                                                                                                                                                                                      |
|----------------------------------------------------------------------------|---------------------------------------------------------------------------------------------------------------------------------------------------------------------------------------------------------------------------------------------------------------------------------------------------------------------------------------------------------------------------------------------------------------------------------------------------------------------------------------------------------------------------------------------------------------------------------------------------------------------------------------------------------------------------------------------------------------------------------------------|--------------------------------------------------------------------------------------------------------------------------------------------------------------------------------------------------------------------------------------------------------------------------------------------------------------------------------------------------------------------------------------------------------------------------------------------------------------------------------------------------------------------------------|
| <p>Recommendation of Scientific Name based on nomenclature authorities</p> | <p>Recommend the most similar and valid Scientific Name and Scientific Name Authorship according to nomenclature authorities based on string similarity algorithms and in nomenclature rules and conventions. Details can be found at: <a href="http://sourceforge.net/p/filteredpush/svn/HEAD/tree/trunk/FP-Tools/FP-CurationServices/src/main/java/edu/harvard/mcz/nametools/">http://sourceforge.net/p/filteredpush/svn/HEAD/tree/trunk/FP-Tools/FP-CurationServices/src/main/java/edu/harvard/mcz/nametools/</a>. Applicable to Darwin Core based single records.</p> <p>Nomenclatural authority sources: Catalog of Life   Global Name Resolver   Global Name Index   GBIF CheckListBank Backbone   IPNI   Index Fungorum   WoRMS.</p> | <p>Name: FP-AKKA Kurator</p> <p>Description: This software produces a data quality report on a set of natural science collections data. The software examines the data records for internal consistency, checks them against external services (such as Geolocate), identifies potential problems, and where possible, proposes corrections that may be applied to the data.</p> <p>Institution: Kurator Project</p> <p>URL: <a href="http://wiki.datakurator.net/web/Kurator">http://wiki.datakurator.net/web/Kurator</a></p> |
| <p>Recommendation of Collected Date based on ISO 8601 standard</p>         | <p>Recommend ISO 8601 standardized value for dwc:eventDate based on its own value, changing the order of year, month and day if they can be parsed or try to use dwc:year, dwc:month, dwc:day and dwc:startDayOfYear values to infer the corresponding dwc:evendDate value. Applicable to Darwin Core based single records.</p>                                                                                                                                                                                                                                                                                                                                                                                                             | <p>Name: Biodiversity Data Quality Toolkit</p> <p>Description: This toolkit provides an Application Programming Interface (API) for ad hoc use by applications that are able to consume Representational State Transfer (REST) web services. This toolkit provides mechanisms to measure and validate DQ of both Multi-Records and single records based on the Darwin Core standard.</p> <p>Institution: Biocomp</p> <p>URL: <a href="http://toolkit.bdq.biocomp.org.br:3020">http://toolkit.bdq.biocomp.org.br:3020</a></p>   |

|                                                                                                    |                                                                                                                                                                                                                                                                                                                                                                                                                                                                             |                                                                                                                                                                                                                                                                                                                                                                                                                                                                                                                                |
|----------------------------------------------------------------------------------------------------|-----------------------------------------------------------------------------------------------------------------------------------------------------------------------------------------------------------------------------------------------------------------------------------------------------------------------------------------------------------------------------------------------------------------------------------------------------------------------------|--------------------------------------------------------------------------------------------------------------------------------------------------------------------------------------------------------------------------------------------------------------------------------------------------------------------------------------------------------------------------------------------------------------------------------------------------------------------------------------------------------------------------------|
| Recommendation of Coordinates based on the associated country, state/province, county and locality | <p>Change signs (positive and negative) of dwc:decimalLatitude and dwc:decimalLongitude and recommend the dwc:decimalLatitude and dwc:decimalLongitude that is consistent with dwc:country or consistent with the georeference of dwc:country, dwc:stateProvince, dwc:county and dwc:locality. Applicable to Darwin Core based single records.</p> <p>Georeference sources:<br/>GeoLocate   Land data from Natural Earth<br/>  Country boundary data from GeoCommunity.</p> | <p>Name: FP-AKKA Kurator</p> <p>Description: This software produces a data quality report on a set of natural science collections data. The software examines the data records for internal consistency, checks them against external services (such as Geolocate), identifies potential problems, and where possible, proposes corrections that may be applied to the data.</p> <p>Institution: Kurator Project</p> <p>URL: <a href="http://wiki.datakurator.net/web/Kurator">http://wiki.datakurator.net/web/Kurator</a></p> |
|----------------------------------------------------------------------------------------------------|-----------------------------------------------------------------------------------------------------------------------------------------------------------------------------------------------------------------------------------------------------------------------------------------------------------------------------------------------------------------------------------------------------------------------------------------------------------------------------|--------------------------------------------------------------------------------------------------------------------------------------------------------------------------------------------------------------------------------------------------------------------------------------------------------------------------------------------------------------------------------------------------------------------------------------------------------------------------------------------------------------------------------|

---

Accept all recommendations for records in the Multi-Record

For all records in Multi-Record, change values of dwc:scientificName and dwc:scientificNameAuthorship to the most similar and valid dwc:scientificName and dwc:scientificNameAuthorship according to nomenclature authorities based on string similarity algorithms and in nomenclature rules and conventions; change value of dwc:eventDate to an ISO 8601 standardized value based on its own value when it is possible to parse value into year, month and day or change dwc:eventDate to a date obtained from dwc:year, dwc:month, dwc:day and dwc:startDayOfYear values; and change values of dwc:decimalLatitude and dwc:decimalLongitude values with different signs (positive and negative) that is consistent with dwc:country or consistent with the georeference of dwc:country, dwc:stateProvince, dwc:county and dwc:locality. Applicable to Multi-Records of Darwin Core based records.

Georeference sources:  
GeoLocate | Land data from Natural Earth | Country boundary data from GeoCommunity.

Life span of collectors sources:  
Harvard List of Botanists | FilteredPush Entomologists List.

Nomenclatural authority sources:  
Catalog of Life | Global Name Resolver | Global Name Index | GBIF CheckListBank Backbone | IPNI | Index Fungorum | WoRMS.

Name: Biodiversity Data Quality Toolkit

Description: This toolkit provides an Application Programming Interface (API) for ad hoc use by applications that are able to consume Representational State Transfer (REST) web services. This toolkit provides mechanisms to measure and validate DQ of both Multi-Records and single records based on the Darwin Core standard.

Institution: Biocomp

URL: <http://toolkit.bdq.biocomp.org.br:3020>

Disregard all records that are not compliant with all the DQ Criteria

Disregard records in Multi-Record with dwc:decimalLatitude and dwc:decimalLongitude values that are both equal to zero or one of them is equal to empty or they are not consistent with coordinates ranges (latitudes range from -90 to 90 and longitudes range from -180 to 180) and are not consistent with the bounds of dwc:country or not close enough (currently defined as 200 km) from the georeference for dwc:country, dwc:stateProvince, dwc:county and dwc:locality; or dwc:eventDate value is equal to empty or is not correctly formatted according to ISO 8601 standard or is not before dwc:modified or is not within life span of dwc:collectedBy; or there is not an exact match with both dwc:scientificName and dwc:scientificNameAuthorship values with nomenclature authorities or one of their values is empty. Applicable to Multi-Records of Darwin Core based records.

Georeference sources:  
GeoLocate | Land data from Natural Earth  
| Country boundary data from  
GeoCommunity.

Life span of collectors sources:  
Harvard List of Botanists | FilteredPush  
Entomologists List.

Nomenclatural authority sources:  
Catalog of Life | Global Name Resolver |  
Global Name Index | GBIF CheckListBank  
Backbone | IPNI | Index Fungorum |  
WoRMS.

Name: Biodiversity Data Quality Toolkit

Description: This toolkit provides an Application Programming Interface (API) for ad hoc use by applications that are able to consume Representational State Transfer (REST) web services. This toolkit provides mechanisms to measure and validate DQ of both Multi-Records and single records based on the Darwin Core standard.

Institution: Biocomp

URL: <http://toolkit.bdq.biocomp.org.br:3020>

# 3. DQ STATUS

The DQ status is a list of assertions (DQ Measures, DQ Validations and DQ Amendments), created based on a particular DQ profile, that describes the current status of quality of a particular Data Resource. The DQ status supports data users and data owner to perform the fitness for use assessment and management according to the defined DQ profile.

We present two example of DQ reports organized into the following parts:

1. **Data Resource:** presents the Data Resources, where the first example presents a Single Record and the second example presents a Multi-Record.
2. **DQ Measures:** presents the DQ Measures assertions obtained for each Data Resource based on the DQ Dimensions defined in the DQ Measurement Policy and their respective DQ Solutions.
3. **DQ Validations:** presents the DQ Validations assertions obtained for each Data Resource based on the DQ Criteria defined in the DQ Validation Policy and their respective DQ Solutions.
4. **DQ Amendment:** presents the DQ Amendment assertions obtained for each Data Resource based on the DQ Enhancements defined in the DQ Enhancement Policy and their respective DQ Solutions.

## 3.1. DQ STATUS

### 3.1.1. DATA RESOURCE (Single Record)

| Fields                             | Value                                                                                                                                                                               |
|------------------------------------|-------------------------------------------------------------------------------------------------------------------------------------------------------------------------------------|
| URL                                | <a href="http://case.bdq.biocomp.org.br:3010/api/v1.0/OriginalData/555f7b8ed53d8661fd3f53ed">http://case.bdq.biocomp.org.br:3010/api/v1.0/OriginalData/555f7b8ed53d8661fd3f53ed</a> |
| dwc:eventDate                      | 0000-00-00                                                                                                                                                                          |
| dwc:municipality                   | Tijuana Municipality                                                                                                                                                                |
| dwc:oiid                           | SCAN.occurrence.925670                                                                                                                                                              |
| dwc:identifiedBy                   | R.M. Bohart                                                                                                                                                                         |
| dwc:georeferenceSources            | Google Earth                                                                                                                                                                        |
| dwc:geodeticDatum                  | WGS84                                                                                                                                                                               |
| dwc:family                         | Vespidae                                                                                                                                                                            |
| dwc:catalogNumber                  | ASUHIC0032157                                                                                                                                                                       |
| dwc:recordedBy                     | C. Saheitlin                                                                                                                                                                        |
| dwc:stateProvince                  | Baja California                                                                                                                                                                     |
| dwc:year                           | 1968                                                                                                                                                                                |
| dwc:dateIdentified                 | 1972                                                                                                                                                                                |
| dwc:startDayOfYear                 | 176                                                                                                                                                                                 |
| dwc:scientificName                 | Vespula pensylvanica                                                                                                                                                                |
| dwc:georeferenceVerificationStatus | requires verification                                                                                                                                                               |
| dwc:scientificNameAuthorship       | Rohwer, 1857                                                                                                                                                                        |
| dwc:ownerInstitutionCode           | ASU                                                                                                                                                                                 |
| dwc:taxonID                        | <a href="http://api.gbif.org/v1/species/1311698">http://api.gbif.org/v1/species/1311698</a>                                                                                         |
| dwc:collectionCode                 | ASUHIC                                                                                                                                                                              |

## Framework Validation - Proof of Concept

|                       |                           |
|-----------------------|---------------------------|
| dwc:modified          | 2013-12-05 20:02:40       |
| dwc:country           | Mexico                    |
| dwc:occurrenceRemarks | no collection date record |
| dwc:decimalLatitude   | 32.507822                 |
| dwc:basisOfRecord     | PreservedSpecimen         |
| dwc:institutionCode   | ASU                       |
| dwc:decimalLongitude  | -116.975289               |
| dwc:month             | 6                         |
| dwc:locality          | Los Angeles               |
| dwc:day               | 24                        |
| dwc:georeferencedBy   | David Fleming             |
| id                    | 555f7b8ed53d8661fd3f53ed  |

### 3.1.2. DQ MEASURES (Single Record)

| Dimension in Context                           | Assertion      | Specification                                                                                                                                                                                                                                                                                                                                                                                                                                                                                                                         | Mechanism                   |
|------------------------------------------------|----------------|---------------------------------------------------------------------------------------------------------------------------------------------------------------------------------------------------------------------------------------------------------------------------------------------------------------------------------------------------------------------------------------------------------------------------------------------------------------------------------------------------------------------------------------|-----------------------------|
| Coordinates Completeness of Single Records     | COMPLETE       | Check if values (disregarding extra spaces) for both dwc:decimalLatitude and dwc:decimalLongitude are different to zero and different to empty. Applicable to Darwin Core based single records.                                                                                                                                                                                                                                                                                                                                       | Name:<br>FP-AKKA<br>Kurator |
| Coordinates Consistency of Single Records      | NOT CONSISTENT | Check if dwc:decimalLatitude and dwc:decimalLongitude values are consistent with coordinates ranges (latitudes range from -90 to 90 and longitudes range from -180 to 180) and are consistent with the bounds of dwc:country or close enough (currently defined as 200 km) from the georeference for dwc:country, dwc:stateProvince, dwc:county and dwc:locality. Applicable to Darwin Core based single records.<br><br>Georeference sources:<br>GeoLocate   Land data from Natural Earth   Country boundary data from GeoCommunity. | Name:<br>FP-AKKA<br>Kurator |
| Scientific Name Completeness of Single Records | COMPLETE       | Check if values (disregarding extra spaces) for both dwc:scientificName and dwc:scientificNameAuthorship are different to empty. Applicable to Darwin Core based single records.                                                                                                                                                                                                                                                                                                                                                      | Name:<br>FP-AKKA<br>Kurator |

## Framework Validation - Proof of Concept

|                                                      |                       |                                                                                                                                                                                                                                                                                                                                                                                                                                                                                                                                                                                                                                                                                                                                                                                                                                                                                                                                                                                                                                                                                                                                                                                                                                                                                                               |                                      |
|------------------------------------------------------|-----------------------|---------------------------------------------------------------------------------------------------------------------------------------------------------------------------------------------------------------------------------------------------------------------------------------------------------------------------------------------------------------------------------------------------------------------------------------------------------------------------------------------------------------------------------------------------------------------------------------------------------------------------------------------------------------------------------------------------------------------------------------------------------------------------------------------------------------------------------------------------------------------------------------------------------------------------------------------------------------------------------------------------------------------------------------------------------------------------------------------------------------------------------------------------------------------------------------------------------------------------------------------------------------------------------------------------------------|--------------------------------------|
| <p>Scientific Name Conformity of Single Records</p>  | <p>NOT CONFORM</p>    | <p>Check against nomenclature authorities if there is an exact match with both <code>dwc:scientificName</code> and <code>dwc:scientificNameAuthorship</code> values. Applicable to Darwin Core based single records.</p> <p>Nomenclatural authority sources:<br/>           Catalog of Life   Global Name Resolver   Global Name Index   GBIF CheckListBank Backbone   IPNI   Index Fungorum   WoRMS.</p>                                                                                                                                                                                                                                                                                                                                                                                                                                                                                                                                                                                                                                                                                                                                                                                                                                                                                                     | <p>Name:<br/>FP-AKKA<br/>Kurator</p> |
| <p>Collected Date Completeness of Single Records</p> | <p>COMPLETE</p>       | <p>Check if value (disregarding extra spaces) for <code>dwc:eventDate</code> is different to empty. Applicable to Darwin Core based single records.</p>                                                                                                                                                                                                                                                                                                                                                                                                                                                                                                                                                                                                                                                                                                                                                                                                                                                                                                                                                                                                                                                                                                                                                       | <p>Name:<br/>FP-AKKA<br/>Kurator</p> |
| <p>Collected Date Consistency of Single Records</p>  | <p>NOT CONSISTENT</p> | <p>Check if <code>dwc:eventDate</code> value is correctly formatted according to ISO 8601 standard and is before <code>dwc:modified</code> and within life span of <code>dwc:collectedBy</code>. Applicable to Darwin Core based single records.</p> <p>Life span of collectors sources:<br/>           Harvard List of Botanists   FilteredPush Entomologists List.</p>                                                                                                                                                                                                                                                                                                                                                                                                                                                                                                                                                                                                                                                                                                                                                                                                                                                                                                                                      | <p>Name:<br/>FP-AKKA<br/>Kurator</p> |
| <p>Occurrence Completeness of Single Records</p>     | <p>COMPLETE</p>       | <p>Check if values (disregarding extra spaces) for both <code>dwc:decimalLatitude</code> and <code>dwc:decimalLongitude</code> are different to zero or empty and values for <code>dwc:eventDate</code>, <code>dwc:scientificName</code> and <code>dwc:scientificNameAuthorship</code> are different to empty. Applicable to Darwin Core based single records.</p>                                                                                                                                                                                                                                                                                                                                                                                                                                                                                                                                                                                                                                                                                                                                                                                                                                                                                                                                            | <p>Name:<br/>FP-AKKA<br/>Kurator</p> |
| <p>Occurrence Accuracy of Single Records</p>         | <p>NOT ACCURATE</p>   | <p>Check if <code>dwc:decimalLatitude</code> and <code>dwc:decimalLongitude</code> values are consistent with coordinates ranges (latitudes range from -90 to 90 and longitudes range from -180 to 180) and are consistent with the bounds of <code>dwc:country</code> or close enough (currently defined as 200 km) to the georeference for <code>dwc:country</code>, <code>dwc:stateProvince</code>, <code>dwc:county</code> and <code>dwc:locality</code> and if <code>dwc:eventDate</code> value is correctly formatted according to ISO 8601 standard and is before <code>dwc:modified</code> and within life span of <code>dwc:collectedBy</code> and if there is an exact match with both <code>dwc:scientificName</code> and <code>dwc:scientificNameAuthorship</code> values with nomenclature authorities. Applicable to Darwin Core based single records.</p> <p>Georeference sources:<br/>           GeoLocate   Land data from Natural Earth   Country boundary data from GeoCommunity.</p> <p>Life span of collectors sources:<br/>           Harvard List of Botanists   FilteredPush Entomologists List.</p> <p>Nomenclatural authority sources:<br/>           Catalog of Life   Global Name Resolver   Global Name Index   GBIF CheckListBank Backbone   IPNI   Index Fungorum   WoRMS.</p> | <p>Name:<br/>FP-AKKA<br/>Kurator</p> |



### 3.1.3. DQ VALIDATIONS (Single Record)

| Criterion in Context                                           | Assertion     | Specification                                                                                                                                                                                                                                                                                                                                                                                                                                                                                                                         | Mechanism                   |
|----------------------------------------------------------------|---------------|---------------------------------------------------------------------------------------------------------------------------------------------------------------------------------------------------------------------------------------------------------------------------------------------------------------------------------------------------------------------------------------------------------------------------------------------------------------------------------------------------------------------------------------|-----------------------------|
| Coordinates must be complete                                   | COMPLIANT     | Check if values (disregarding extra spaces) for both dwc:decimalLatitude and dwc:decimalLongitude are different to zero and different to empty. Applicable to Darwin Core based single records.                                                                                                                                                                                                                                                                                                                                       | Name:<br>FP-AKKA<br>Kurator |
| Coordinates must be consistent                                 | NOT COMPLIANT | Check if dwc:decimalLatitude and dwc:decimalLongitude values are consistent with coordinates ranges (latitudes range from -90 to 90 and longitudes range from -180 to 180) and are consistent with the bounds of dwc:country or close enough (currently defined as 200 km) from the georeference for dwc:country, dwc:stateProvince, dwc:county and dwc:locality. Applicable to Darwin Core based single records.<br><br>Georeference sources:<br>GeoLocate   Land data from Natural Earth   Country boundary data from GeoCommunity. | Name:<br>FP-AKKA<br>Kurator |
| Scientific Name must be complete                               | COMPLIANT     | Check if values (disregarding extra spaces) for both dwc:scientificName and dwc:scientificNameAuthorship are different to empty. Applicable to Darwin Core based single records.                                                                                                                                                                                                                                                                                                                                                      | Name:<br>FP-AKKA<br>Kurator |
| Scientific Name must be conform with nomenclatural authorities | NOT COMPLIANT | Check against nomenclature authorities if there is an exact match with both dwc:scientificName and dwc:scientificNameAuthorship values. Applicable to Darwin Core based single records.<br><br>Nomenclatural authority sources:<br>Catalog of Life   Global Name Resolver   Global Name Index   GBIF CheckListBank Backbone   IPNI   Index Fungorum   WoRMS.                                                                                                                                                                          | Name:<br>FP-AKKA<br>Kurator |
| Collected Date must be complete                                | COMPLIANT     | Check if value (disregarding extra spaces) for dwc:eventDate is different to empty. Applicable to Darwin Core based single records.                                                                                                                                                                                                                                                                                                                                                                                                   | Name:<br>FP-AKKA<br>Kurator |
| Collected Date must be consistent                              | NOT COMPLIANT | Check if dwc:eventDate value is correctly formatted according to ISO 8601 standard and is before dwc:modified and within life span of dwc:collectedBy. Applicable to Darwin Core based single records.<br><br>Life span of collectors sources:<br>Harvard List of Botanists   FilteredPush Entomologists List.                                                                                                                                                                                                                        | Name:<br>FP-AKKA<br>Kurator |

## Framework Validation - Proof of Concept

|                             |               |                                                                                                                                                                                                                                                                                                                                                                                                                                                                                                                                                                                                                                                                                                                                                                                                                                                                                                                                                                                                                                                                                                                  |                                      |
|-----------------------------|---------------|------------------------------------------------------------------------------------------------------------------------------------------------------------------------------------------------------------------------------------------------------------------------------------------------------------------------------------------------------------------------------------------------------------------------------------------------------------------------------------------------------------------------------------------------------------------------------------------------------------------------------------------------------------------------------------------------------------------------------------------------------------------------------------------------------------------------------------------------------------------------------------------------------------------------------------------------------------------------------------------------------------------------------------------------------------------------------------------------------------------|--------------------------------------|
| Occurrence must be complete | COMPLIANT     | <p>Check if values (disregarding extra spaces) for both dwc:decimalLatitude and dwc:decimalLongitude are different to zero or empty and values for dwc:eventDate, dwc:scientificName and dwc:scientificNameAuthorship are different to empty. Applicable to Darwin Core based single records.</p>                                                                                                                                                                                                                                                                                                                                                                                                                                                                                                                                                                                                                                                                                                                                                                                                                | <p>Name:<br/>FP-AKKA<br/>Kurator</p> |
| Occurrence must be accurate | NOT COMPLIANT | <p>Check if dwc:decimalLatitude and dwc:decimalLongitude values are consistent with coordinates ranges (latitudes range from -90 to 90 and longitudes range from -180 to 180) and are consistent with the bounds of dwc:country or close enough (currently defined as 200 km) to the georeference for dwc:country, dwc:stateProvince, dwc:county and dwc:locality and if dwc:eventDate value is correctly formatted according to ISO 8601 standard and is before dwc:modified and within life span of dwc:collectedBy and if there is an exact match with both dwc:scientificName and dwc:scientificNameAuthorship values with nomenclature authorities. Applicable to Darwin Core based single records.</p> <p>Georeference sources:<br/>GeoLocate   Land data from Natural Earth   Country boundary data from GeoCommunity.</p> <p>Life span of collectors sources:<br/>Harvard List of Botanists   FilteredPush Entomologists List.</p> <p>Nomenclatural authority sources:<br/>Catalog of Life   Global Name Resolver   Global Name Index   GBIF CheckListBank Backbone   IPNI   Index Fungorum   WoRMS.</p> | <p>Name:<br/>FP-AKKA<br/>Kurator</p> |

### 3.1.4. DQ AMENDMENT (Single Record)

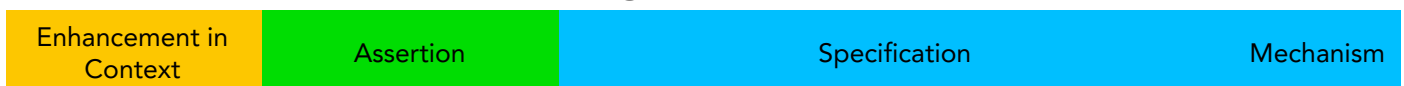

|                                                                                                           |                                                                                                |                                                                                                                                                                                                                                                                                                                                                                                                                                                                                                                                                                                                                                                                                                                                             |                                                |
|-----------------------------------------------------------------------------------------------------------|------------------------------------------------------------------------------------------------|---------------------------------------------------------------------------------------------------------------------------------------------------------------------------------------------------------------------------------------------------------------------------------------------------------------------------------------------------------------------------------------------------------------------------------------------------------------------------------------------------------------------------------------------------------------------------------------------------------------------------------------------------------------------------------------------------------------------------------------------|------------------------------------------------|
| <p>Recommendation of Scientific Name based on nomenclature authorities</p>                                | <p>scientificName: "Vespula pensylvanica", scientificNameAuthorship: "(de Saussure, 1857)"</p> | <p>Recommend the most similar and valid Scientific Name and Scientific Name Authorship according to nomenclature authorities based on string similarity algorithms and in nomenclature rules and conventions. Details can be found at: <a href="http://sourceforge.net/p/filteredpush/svn/HEAD/tree/trunk/FP-Tools/FP-CurationServices/src/main/java/edu/harvard/mcz/nametools/">http://sourceforge.net/p/filteredpush/svn/HEAD/tree/trunk/FP-Tools/FP-CurationServices/src/main/java/edu/harvard/mcz/nametools/</a>. Applicable to Darwin Core based single records.</p> <p>Nomenclatural authority sources: Catalog of Life   Global Name Resolver   Global Name Index   GBIF CheckListBank Backbone   IPNI   Index Fungorum   WoRMS.</p> | <p>Name: FP-AKKA<br/>Kurator</p>               |
| <p>Recommendation of Collected Date based on ISO 8601 standard</p>                                        | <p>eventDate: "1968-06-24"</p>                                                                 | <p>Recommend ISO 8601 standardized value for dwc:eventDate based on its own value, changing the order of year, month and day if they can be parsed or try to use dwc:year, dwc:month, dwc:day and dwc:startDayOfYear values to infer the corresponding dwc:eventDate value. Applicable to Darwin Core based single records.</p>                                                                                                                                                                                                                                                                                                                                                                                                             | <p>Name: Biodiversity Data Quality Toolkit</p> |
| <p>Recommendation of Coordinates based on the associated country, state/province, county and locality</p> | <p>NO ASSERTION</p>                                                                            | <p>Change signs (positive and negative) of dwc:decimalLatitude and dwc:decimalLongitude and recommend the dwc:decimalLatitude and dwc:decimalLongitude that is consistent with dwc:country or consistent with the georeference of dwc:country, dwc:stateProvince, dwc:county and dwc:locality. Applicable to Darwin Core based single records.</p> <p>Georeference sources: GeoLocate   Land data from Natural Earth   Country boundary data from GeoCommunity.</p>                                                                                                                                                                                                                                                                         | <p>Name: FP-AKKA<br/>Kurator</p>               |

## 3.2. DQ STATUS

### 3.2.1. DATA RESOURCE (Multi-Record)

| Fields            | Value                                                                                                                             |
|-------------------|-----------------------------------------------------------------------------------------------------------------------------------|
| URL               | <a href="http://case.bdq.biocomp.org.br:3010/api/v1.0/OriginalData">http://case.bdq.biocomp.org.br:3010/api/v1.0/OriginalData</a> |
| Number of Records | 52411                                                                                                                             |

### 3.2.2. DQ MEASURES (Multi-Record)

| Dimension in Context                          | Assertion    | Specification                                                                                                                                                                                                                                                                                                                                                                                                                                                                                                                                                          | Mechanism                               |
|-----------------------------------------------|--------------|------------------------------------------------------------------------------------------------------------------------------------------------------------------------------------------------------------------------------------------------------------------------------------------------------------------------------------------------------------------------------------------------------------------------------------------------------------------------------------------------------------------------------------------------------------------------|-----------------------------------------|
| Coordinates Completeness of Multi-Records     | 0.9999236815 | Calculate the proportion of records in Multi-Record with values (disregarding extra spaces) different to zero and different to empty for both dwc:decimalLatitude and dwc:decimalLongitude. Applicable to Multi-Records of Darwin Core based records.                                                                                                                                                                                                                                                                                                                  | Name: Biodiversity Data Quality Toolkit |
| Coordinates Consistency of Multi-Records      | 0.8898153094 | Calculate the proportion of records dwc:decimalLatitude and dwc:decimalLongitude values consistent with coordinates ranges (latitudes range from -90 to 90 and longitudes range from -180 to 180) and are consistent with the bounds of dwc:country or close enough (currently defined as 200 km) from the georeference for dwc:country, dwc:stateProvince, dwc:county and dwc:locality. Applicable to Multi-Records of Darwin Core based records.<br><br>Georeference sources:<br>GeoLocate   Land data from Natural Earth   Country boundary data from GeoCommunity. | Name: Biodiversity Data Quality Toolkit |
| Scientific Name Completeness of Multi-Records | 0.9728115698 | Calculate the proportion of records in Multi-Record with values (disregarding extra spaces) different to empty for both dwc:scientificName and dwc:scientificNameAuthorship. Applicable to Multi-Records of Darwin Core based records.                                                                                                                                                                                                                                                                                                                                 | Name: Biodiversity Data Quality Toolkit |
| Scientific Name Conformity of Multi-Records   | 0.4928260703 | Calculate the proportion of records with an exact match of both dwc:scientificName and dwc:scientificNameAuthorship values with nomenclatural authorities. Applicable to Multi-Records of Darwin Core based records.<br><br>Nomenclatural authority sources:<br>Catalog of Life   Global Name Resolver   Global Name Index   GBIF CheckListBank Backbone   IPNI   Index Fungorum   WoRMS.                                                                                                                                                                              | Name: Biodiversity Data Quality Toolkit |

## Framework Validation - Proof of Concept

|                                              |              |                                                                                                                                                                                                                                                                                                                                                                                                                                                                                                                                                                                                                                                                                                                                                                                                                                                                                                                                                                                                                                                                                                                                                                 |                                            |
|----------------------------------------------|--------------|-----------------------------------------------------------------------------------------------------------------------------------------------------------------------------------------------------------------------------------------------------------------------------------------------------------------------------------------------------------------------------------------------------------------------------------------------------------------------------------------------------------------------------------------------------------------------------------------------------------------------------------------------------------------------------------------------------------------------------------------------------------------------------------------------------------------------------------------------------------------------------------------------------------------------------------------------------------------------------------------------------------------------------------------------------------------------------------------------------------------------------------------------------------------|--------------------------------------------|
| Collected Date Completeness of Multi-Records | 1            | Calculate the proportion of records in Multi-Record that have the dwc:eventDate value (disregarding extra spaces) different to empty. Applicable to Multi-Records of Darwin Core based records.                                                                                                                                                                                                                                                                                                                                                                                                                                                                                                                                                                                                                                                                                                                                                                                                                                                                                                                                                                 | Name:<br>Biodiversity Data Quality Toolkit |
| Collected Date Consistency of Multi-Records  | 0.9670113714 | Calculate the proportion of dwc:eventDate value records that are correctly formatted according to ISO 8601 standard and that are before dwc:modified and within life span of collector. Applicable to Multi-Records of Darwin Core based records.<br><br>Life span of collectors sources:<br>Harvard List of Botanists   FilteredPush Entomologists List.                                                                                                                                                                                                                                                                                                                                                                                                                                                                                                                                                                                                                                                                                                                                                                                                       | Name:<br>Biodiversity Data Quality Toolkit |
| Occurrence Completeness of Multi-Records     | 0.9727352514 | Calculate the proportion of records with values (disregarding extra spaces) for both dwc:decimalLatitude and dwc:decimalLongitude that are different to zero or empty and values for dwc:eventDate, dwc:scientificName and dwc:scientificNameAuthorship that are different to empty. Applicable to Multi-Records of Darwin Core based records.                                                                                                                                                                                                                                                                                                                                                                                                                                                                                                                                                                                                                                                                                                                                                                                                                  | Name:<br>Biodiversity Data Quality Toolkit |
| Occurrence Accuracy of Multi-Records         | 0.4286613752 | Calculate the proportion of records in Multi-Record with values for dwc:decimalLatitude and dwc:decimalLongitude that are consistent with coordinates ranges (latitudes range from -90 to 90 and longitudes range from -180 to 180) and are consistent with the bounds of dwc:country or close enough (currently defined as 200 km) from the georeference for dwc:country, dwc:stateProvince, dwc:county and dwc:locality and value for dwc:eventDate is correctly formatted according to ISO 8601 standard and is before dwc:modified and within life span of dwc:collectedBy and there is an exact match with both dwc:scientificName and dwc:scientificNameAuthorship values with nomenclature authorities. Applicable to Darwin Core based single records.<br><br>Georeference sources:<br>GeoLocate   Land data from Natural Earth   Country boundary data from GeoCommunity.<br><br>Life span of collectors sources:<br>Harvard List of Botanists   FilteredPush Entomologists List.<br><br>Nomenclatural authority sources:<br>Catalog of Life   Global Name Resolver   Global Name Index   GBIF CheckListBank Backbone   IPNI   Index Fungorum   WoRMS. | Name:<br>Biodiversity Data Quality Toolkit |

### 3.2.3. DQ VALIDATIONS

## Framework Validation - Proof of Concept

### (Multi-Record)

| Criterion in Context                                             | Assertion     | Specification                                                                                                                                                                                                                                                                                                                                                                                                                                                                                                                                                                       | Mechanism                               |
|------------------------------------------------------------------|---------------|-------------------------------------------------------------------------------------------------------------------------------------------------------------------------------------------------------------------------------------------------------------------------------------------------------------------------------------------------------------------------------------------------------------------------------------------------------------------------------------------------------------------------------------------------------------------------------------|-----------------------------------------|
| All the Multi-Record records must have complete Coordinates      | NOT COMPLIANT | Check if the proportion of records in Multi-Record with values (disregarding extra spaces) different to zero and different to empty for both dwc:decimalLatitude and dwc:decimalLongitude is equal 100%. Applicable to Multi-Records of Darwin Core based records.                                                                                                                                                                                                                                                                                                                  | Name: Biodiversity Data Quality Toolkit |
| All the Multi-Record records must have consistent Coordinates    | NOT COMPLIANT | Check if the proportion of records dwc:decimalLatitude and dwc:decimalLongitude values consistent with coordinates ranges (latitudes range from -90 to 90 and longitudes range from -180 to 180) and are consistent with the bounds of dwc:country or close enough (currently defined as 200 km) from the georeference for dwc:country, dwc:stateProvince, dwc:county and dwc:locality is equal 100%. Applicable to Multi-Records of Darwin Core based records.<br><br>Georeference sources:<br>GeoLocate   Land data from Natural Earth   Country boundary data from GeoCommunity. | Name: Biodiversity Data Quality Toolkit |
| All the Multi-Record records must have complete Scientific Name  | NOT COMPLIANT | Check if the proportion of records in Multi-Record with values (disregarding extra spaces) different to empty for both dwc:scientificName and dwc:scientificNameAuthorship is equal 100%. Applicable to Multi-Records of Darwin Core based records.                                                                                                                                                                                                                                                                                                                                 | Name: Biodiversity Data Quality Toolkit |
| All the Multi-Record records must have conform Scientific Name   | NOT COMPLIANT | Check if the proportion of records with an exact match of both dwc:scientificName and dwc:scientificNameAuthorship values with nomenclatural authorities is equal 100%. Applicable to Multi-Records of Darwin Core based records.<br><br>Nomenclatural authority sources:<br>Catalog of Life   Global Name Resolver   Global Name Index   GBIF CheckListBank Backbone   IPNI   Index Fungorum   WoRMS.                                                                                                                                                                              | Name: Biodiversity Data Quality Toolkit |
| All the Multi-Record records must have complete Collected Date   | COMPLIANT     | Check if the proportion of records in Multi-Record that have the dwc:eventDate value (disregarding extra spaces) different to empty is equal 100%. Applicable to Multi-Records of Darwin Core based records.                                                                                                                                                                                                                                                                                                                                                                        | Name: Biodiversity Data Quality Toolkit |
| All the Multi-Record records must have consistent Collected Date | NOT COMPLIANT | Check if the proportion of dwc:eventDate value records that are correctly formatted according to ISO 8601 standard and that are before dwc:modified and within life span of collector is equal 100%. Applicable to Multi-Records of Darwin Core based records.<br><br>Life span of collectors sources:<br>Harvard List of Botanists   FilteredPush Entomologists List.                                                                                                                                                                                                              | Name: Biodiversity Data Quality Toolkit |

## Framework Validation - Proof of Concept

|                                                                   |                      |                                                                                                                                                                                                                                                                                                                                                                                                                                                                                                                                                                                                                                                                                                                                                                                                                                                                                                                                                                                                                                                                                                                                                                                        |                                                |
|-------------------------------------------------------------------|----------------------|----------------------------------------------------------------------------------------------------------------------------------------------------------------------------------------------------------------------------------------------------------------------------------------------------------------------------------------------------------------------------------------------------------------------------------------------------------------------------------------------------------------------------------------------------------------------------------------------------------------------------------------------------------------------------------------------------------------------------------------------------------------------------------------------------------------------------------------------------------------------------------------------------------------------------------------------------------------------------------------------------------------------------------------------------------------------------------------------------------------------------------------------------------------------------------------|------------------------------------------------|
| <p>All the Multi-Record records must have complete Occurrence</p> | <p>NOT COMPLIANT</p> | <p>Check if the proportion of records with values (disregarding extra spaces) for both dwc:decimalLatitude and dwc:decimalLongitude that are different to zero or empty and values for dwc:eventDate, dwc:scientificName and dwc:scientificNameAuthorship that are different to empty is equal 100%. Applicable to Multi-Records of Darwin Core based records.</p>                                                                                                                                                                                                                                                                                                                                                                                                                                                                                                                                                                                                                                                                                                                                                                                                                     | <p>Name: Biodiversity Data Quality Toolkit</p> |
| <p>All the Multi-Record records must have accurate Occurrence</p> | <p>NOT COMPLIANT</p> | <p>Check if the proportion of records in Multi-Record with values for dwc:decimalLatitude and dwc:decimalLongitude that are consistent with coordinates ranges (latitudes range from -90 to 90 and longitudes range from -180 to 180) and are consistent with the bounds of dwc:country or close enough (currently defined as 200 km) from the georeference for dwc:country, dwc:stateProvince, dwc:county and dwc:locality and value for dwc:eventDate is correctly formatted according to ISO 8601 standard and is before dwc:modified and within life span of dwc:collectedBy and there is an exact match with both dwc:scientificName and dwc:scientificNameAuthorship values with nomenclature authorities is equal 100%. Applicable to Darwin Core based single records.</p> <p>Georeference sources:<br/>GeoLocate   Land data from Natural Earth   Country boundary data from GeoCommunity.</p> <p>Life span of collectors sources:<br/>Harvard List of Botanists   FilteredPush Entomologists List.</p> <p>Nomenclatural authority sources:<br/>Catalog of Life   Global Name Resolver   Global Name Index   GBIF CheckListBank Backbone   IPNI   Index Fungorum   WoRMS.</p> | <p>Name: Biodiversity Data Quality Toolkit</p> |

### 3.2.4. DQ AMENDMENT (Multi-Record)

| Enhancement in Context                                                                                | Assertion                                                                                                                                                                                  | Specification                                                                                                                                                                                                                                                                                                                                                                                                                                                                                                                                                                                                                                                                                                                                                                                                                                                                                                                                                                                                                                                                                                                                                                                                                                                                                                                                                                   | Mechanism                                                               |
|-------------------------------------------------------------------------------------------------------|--------------------------------------------------------------------------------------------------------------------------------------------------------------------------------------------|---------------------------------------------------------------------------------------------------------------------------------------------------------------------------------------------------------------------------------------------------------------------------------------------------------------------------------------------------------------------------------------------------------------------------------------------------------------------------------------------------------------------------------------------------------------------------------------------------------------------------------------------------------------------------------------------------------------------------------------------------------------------------------------------------------------------------------------------------------------------------------------------------------------------------------------------------------------------------------------------------------------------------------------------------------------------------------------------------------------------------------------------------------------------------------------------------------------------------------------------------------------------------------------------------------------------------------------------------------------------------------|-------------------------------------------------------------------------|
| <p>Accept all recommendations for amendment of records in the Multi-Record (Data Quality Control)</p> | <p>URL:<br/> <a href="http://case.bdq.biocomp.org.br:3010/api/v1.0/DQReportControls">http://case.bdq.biocomp.org.br:3010/api/v1.0/DQReportControls</a></p> <p>Number of Records: 52411</p> | <p>For all records in Multi-Record, change values of dwc:scientificName and dwc:scientificNameAuthorship to the most similar and valid dwc:scientificName and dwc:scientificNameAuthorship according to nomenclature authorities based on string similarity algorithms and in nomenclature rules and conventions; change value of dwc:eventDate to an ISO 8601 standardized value based on its own value when it is possible to parse value into year, month and day or change dwc:eventDate to a date obtained from dwc:year, dwc:month, dwc:day and dwc:startDayOfYear values; and change values of dwc:decimalLatitude and dwc:decimalLongitude values with different signs (positive and negative) that is consistent with dwc:country or consistent with the georeference of dwc:country, dwc:stateProvince, dwc:county and dwc:locality. Applicable to Multi-Records of Darwin Core based records.</p> <p>Georeference sources:<br/>                     GeoLocate   Land data from Natural Earth   Country boundary data from GeoCommunity.</p> <p>Life span of collectors sources:<br/>                     Harvard List of Botanists   FilteredPush Entomologists List.</p> <p>Nomenclatural authority sources:<br/>                     Catalog of Life   Global Name Resolver   Global Name Index   GBIF CheckListBank Backbone   IPNI   Index Fungorum   WoRMS.</p> | <p>Name:<br/>                     Biodiversity Data Quality Toolkit</p> |



## Framework Validation - Proof of Concept

|                                                                                                       |                                                                                                                                                                                                |                                                                                                                                                                                                                                                                                                                                                                                                                                                                                                                                                                                                                                                                                                                                                                                                                                                                                                                                                                                                                                                                                                                                                                                                                                                                                                                                              |                                                               |
|-------------------------------------------------------------------------------------------------------|------------------------------------------------------------------------------------------------------------------------------------------------------------------------------------------------|----------------------------------------------------------------------------------------------------------------------------------------------------------------------------------------------------------------------------------------------------------------------------------------------------------------------------------------------------------------------------------------------------------------------------------------------------------------------------------------------------------------------------------------------------------------------------------------------------------------------------------------------------------------------------------------------------------------------------------------------------------------------------------------------------------------------------------------------------------------------------------------------------------------------------------------------------------------------------------------------------------------------------------------------------------------------------------------------------------------------------------------------------------------------------------------------------------------------------------------------------------------------------------------------------------------------------------------------|---------------------------------------------------------------|
| <p>Disregard all records that are not compliant with all the DQ Criteria (Data Quality Assurance)</p> | <p>URL:<br/> <a href="http://case.bdq.biocomp.org.br:3010/api/v1.0/DQReportAssurances">http://case.bdq.biocomp.org.br:3010/api/v1.0/DQReportAssurances</a></p> <p>Number of Records: 32386</p> | <p>Disregard records in Multi-Record with dwc:decimalLatitude and dwc:decimalLongitude values that are both equal to zero or one of them is equal to empty or they are not consistent with coordinates ranges (latitudes range from -90 to 90 and longitudes range from -180 to 180) and are not consistent with the bounds of dwc:country or not close enough (currently defined as 200 km) from the georeference for dwc:country, dwc:stateProvince, dwc:county and dwc:locality; or dwc:eventDate value is equal to empty or is not correctly formatted according to ISO 8601 standard or is not before dwc:modified or is not within life span of dwc:collectedBy; or there is not an exact match with both dwc:scientificName and dwc:scientificNameAuthorship values with nomenclature authorities or one of their values is empty. Applicable to Multi-Records of Darwin Core based records.</p> <p>Georeference sources:<br/>           GeoLocate   Land data from Natural Earth   Country boundary data from GeoCommunity.</p> <p>Life span of collectors sources:<br/>           Harvard List of Botanists   FilteredPush Entomologists List.</p> <p>Nomenclatural authority sources:<br/>           Catalog of Life   Global Name Resolver   Global Name Index   GBIF CheckListBank Backbone   IPNI   Index Fungorum   WoRMS.</p> | <p>Name:<br/>           Biodiversity Data Quality Toolkit</p> |
|-------------------------------------------------------------------------------------------------------|------------------------------------------------------------------------------------------------------------------------------------------------------------------------------------------------|----------------------------------------------------------------------------------------------------------------------------------------------------------------------------------------------------------------------------------------------------------------------------------------------------------------------------------------------------------------------------------------------------------------------------------------------------------------------------------------------------------------------------------------------------------------------------------------------------------------------------------------------------------------------------------------------------------------------------------------------------------------------------------------------------------------------------------------------------------------------------------------------------------------------------------------------------------------------------------------------------------------------------------------------------------------------------------------------------------------------------------------------------------------------------------------------------------------------------------------------------------------------------------------------------------------------------------------------|---------------------------------------------------------------|
